1 **Dynamic structural adaptations enable the endobiotic predation of**  
2 ***bdellovibrio bacteriovorus***

3  
4 Mohammed Kaplan<sup>1,#</sup>, Yi-Wei Chang<sup>1,2,#</sup>, Catherine M. Oikonomou<sup>1</sup>, William J. Nicolas<sup>1</sup>,  
5 Andrew I. Jewett<sup>3</sup>, Stefan Kreida<sup>1,4</sup>, Przemysław Dutka<sup>1,5</sup>, Lee A. Rettberg<sup>1</sup>, Stefano Maggi<sup>1</sup> and  
6 Grant J. Jensen<sup>1,6,\*</sup>

7 <sup>1</sup>Division of Biology and Biological Engineering, California Institute of Technology, Pasadena, CA 91125, USA

8 <sup>2</sup>Current address: Department of Biochemistry and Biophysics, Perelman School of Medicine, University of  
9 Pennsylvania, Philadelphia, PA 19104, USA

10 <sup>3</sup>Department of Integrative Structural and Computational Biology, The Scripps Research Institute, La Jolla, CA,  
11 USA

12 <sup>4</sup>Department of Microbiology, Tumor and Cell Biology, Karolinska Institute, 17177 Stockholm, Sweden

13 <sup>5</sup>Division of Chemistry and Chemical Engineering, California Institute of Technology, 1200 California Boulevard,  
14 Pasadena, CA 91125, USA

15 <sup>6</sup>Department of Chemistry and Biochemistry, Brigham Young University, Provo, UT 84604, USA

16 \*Corresponding author: [grant\\_jensen@byu.edu](mailto:grant_jensen@byu.edu)

17 #equal contribution

18  
19  
20  
21  
22  
23  
24  
25

## 26 Graphical abstract

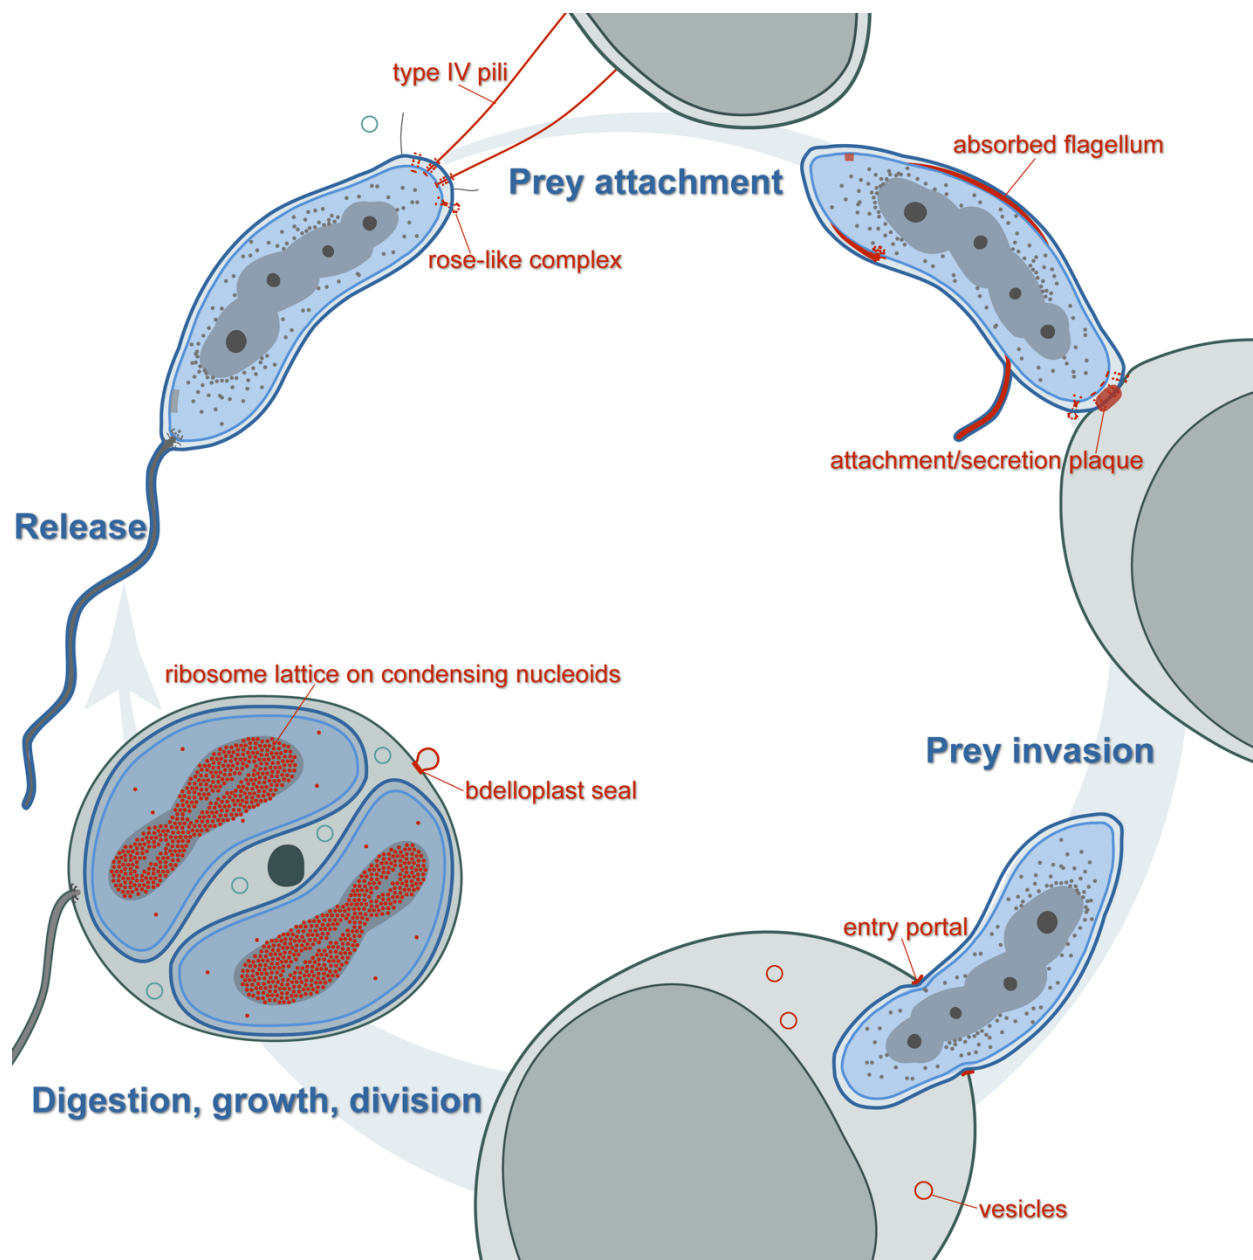

27

28

29

30

31

32 **Abstract**

33 *Bdellovibrio bacteriovorus* is an endobiotic microbial predator that offers promise as a living  
34 antibiotic for its ability to kill Gram-negative bacteria, including human pathogens. Even after six  
35 decades of study, fundamental details of its predation cycle remain mysterious. Here, we used  
36 cryo-electron tomography to comprehensively image the lifecycle of *B. bacteriovorus* at  
37 nanometer-scale resolution. In addition to providing the first high-resolution images of predation  
38 in a native (hydrated, unstained) state, we also discover several surprising features of the process,  
39 including novel macromolecular complexes involved in prey attachment/invasion and a flexible  
40 portal structure lining a hole in the prey peptidoglycan that tightly seals the prey outer membrane  
41 around the predator during entry. Unexpectedly, we find that *B. bacteriovorus* does not shed its  
42 flagellum during invasion, but rather resorbs it into its periplasm for degradation. Finally,  
43 following replication and division in the bdelloplast, we observe a transient and extensive  
44 ribosomal lattice on the condensed *B. bacteriovorus* nucleoid.

## 45 **Introduction**

46 Predation is a widespread behavior, from the largest eukaryotes to the smallest viruses, that drives  
47 evolution and energy flow in biological communities. In bacteria, predatory behavior is common  
48 and multiple predation types have been described, including epibiotic strategies in which the  
49 predator remains outside the prey and endobiotic strategies in which the predator invades the  
50 prey's cytoplasm or periplasm (Pérez et al., 2016). Since its description in 1963 as the first known  
51 bacterial parasite of bacteria (Stolp and Starr, 1963), *Bdellovibrio bacteriovorus* has been a  
52 paradigm of periplasmic endobiotic predation, in which a small predator takes up residence in a  
53 larger diderm prey's periplasm (Laloux, 2020; Sockett, 2009). The ability of *Bdellovibrio*-and-  
54 like-organisms (BALOs) to invade other Gram-negative bacteria, including human pathogens, has  
55 rendered them potential candidates for living antibiotics to tackle the crisis of antimicrobial  
56 resistance that has emerged in the past few decades (Bratanis et al., 2020; Cavallo et al., 2021;  
57 Harini et al., 2013; Iebba et al., 2014; Madhusoodanan, 2019; Negus et al., 2017; Pantanella et al.,  
58 2018; Raghunathan et al., 2019; Russo et al., 2018; Shatzkes et al., 2017a, 2017b), or even as a  
59 possible probiotic agent (Bonfiglio et al., 2020). For example, it has been shown that treating  
60 zebrafish infected with *Shigella flexneri* with *B. bacteriovorus* increases the animals' survival rate  
61 (Willis et al., 2016). In addition, microbial predation has been suggested to have been involved in  
62 pivotal evolutionary events including the genesis of eukaryotic cells, the rise of multicellularity,  
63 and pathogenicity (Davidov and Jurkevitch, 2009; Erken et al., 2013; Lyons and Kolter, 2015).

64  
65 The predatory lifecycle of *B. bacteriovorus* has been extensively studied by methods including  
66 conventional transmission electron microscopy, light/fluorescence microscopy, helium-ion  
67 microscopy, atomic force microscopy and biochemical assays (Burnham et al., 1968; Kuru et al.,

68 2017; Makowski et al., 2020; Núñez et al., 2003; Said et al., 2019; Stolp and Starr, 1965), and is  
69 the subject of several excellent reviews (see for example: (Cavallo et al., 2021; Laloux, 2020;  
70 Negus et al., 2017; Rotem et al., 2014; Sockett, 2009)). In the free-living attack phase, the predator  
71 is transcriptionally streamlined, with a highly compacted spiral nucleoid (Butan et al., 2011), and  
72 a vibrioid cell shape caused by the asymmetric activity of a peptidoglycan hydrolase (Banks et al.,  
73 2022). At one pole of the cell, a sheathed unipolar flagellum enables high-velocity (up to 160  $\mu\text{m/s}$   
74 (Lambert et al., 2006; Rendulic, 2004)) motile collisions with prey. The flagellar filament has a  
75 distinctive damped waveform due to segments made up of subunits with different helical properties  
76 (Thomashow and Rittenberg, 1985a). Initial interaction with, and attachment to, prey is mediated  
77 by type IVb (Avidan et al., 2017) and type IVa pili (T4P) (Evans et al., 2007; Mahmoud and Koval,  
78 2010; Milner et al., 2014) at the pole opposite the flagellum (the “biting pole”). Following this  
79 initial interaction, *B. bacteriovorus* uses flagellum-independent gliding motility to reach an  
80 attachment site on the side of rod-shaped prey cells (Lambert et al., 2011).

81  
82 Upon initial attachment, prey quality is assessed in a cyclic-di-GMP-dependent process (Caulton  
83 and Lovering, 2020; Hogley et al., 2012; Meek et al., 2019), and if the prey is found to be suitable  
84 and not already under attack by another predator (Lerner et al., 2012), the attachment is made  
85 permanent and the process of invasion begins. Initially, it was suggested that a “drilling”  
86 mechanism caused by flagellar rotation might play a role in the invasion process (Burnham et al.,  
87 1968; Stolp and Starr, 1965), but later studies found that flagellar motility-compromised mutants  
88 can still invade prey, which fits with the roles of pili and gliding motility mentioned above  
89 (Lambert et al., 2006). Another early penetration model hypothesized that entry is passive and

90 occurs due to osmotic forces from the flux of solutes and water resulting from structural changes  
91 in the prey envelope (Abram et al., 1974).

92

93 Prey invasion involves enzymatic modification of the prey cell wall by *B. bacteriovorus* at the  
94 predator-prey contact point (Kuru et al., 2017; Thomashow and Rittenberg, 1978c, 1978b, 1978a;  
95 Tudor et al., 1990) and is associated with the secretion, by type I and II secretion systems, of many  
96 enzymes (Pasternak et al., 2014; Rendulic, 2004), including glycanases (Harding et al., 2020;  
97 Thomashow and Rittenberg, 1978a), peptidases (Lerner et al., 2012; Tudor et al., 1990) and  
98 deacetylases (Lambert et al., 2016). A self-protection protein in *B. bacteriovorus* inhibits the  
99 predator's peptidases, thereby allowing specific modification of the prey cell wall (Lambert et al.,  
100 2015). These modifications round the prey cell and greatly expand the periplasmic space,  
101 providing room for the predator to enter. Entry itself is rapid, occurring in a few minutes or less  
102 (Abram et al., 1974; Capeness et al., 2013). With a few exceptions noted (Iida et al., 2009; Lambert  
103 et al., 2006), flagella are no longer visible on *B. bacteriovorus* when they enter their prey (Shilo,  
104 1969; Thomashow, L. S., 1979).

105

106 Once *B. bacteriovorus* enters the prey's periplasm, the entry pore is sealed and transpeptidases  
107 modify the prey cell wall to render it more robust to osmotic pressure (Kuru et al., 2017; Lerner et  
108 al., 2012), forming what is known as the bdelloplast (Starr and Baigent, 1966). If prey-derived  
109 cues indicate the availability of sufficient nutrients in the bdelloplast (Rotem et al., 2015), *B.*  
110 *bacteriovorus* enters its growth phase. The predator consumes the cytoplasmic contents of the prey,  
111 facilitated by translocation of outer membrane (OM) pore proteins into the prey's cytoplasmic  
112 membrane (Tudor and Karp, 1994) and secretion of nucleases to digest the prey's nucleic acids

113 (Bukowska-Faniband et al., 2020). This fuels predator growth, through bidirectional elongation,  
114 and replication of its genetic material (Makowski et al., 2019). Once available nutrients are  
115 exhausted, the predator septates synchronously into multiple progeny cells by non-binary fission,  
116 with the number of progeny cells depending on the size of the prey (Fenton et al., 2010a; Kaljević  
117 et al., 2021). Finally, the progeny cells, reset to the attack phase, use an enzyme specific for  
118 deacetylated peptidoglycan to lyse the prey cell wall (Harding et al., 2020; Lambert et al., 2016),  
119 creating pores through which they exit the bdelloplast and move on in search of new prey (Fenton  
120 et al., 2010a). If the first invasion does not yield sufficient nutrients for replication and division, a  
121 *B. bacteriovorus* cell may leave the first bdelloplast and complete its lifecycle in a second prey  
122 (Makowski et al., 2019).

123

124 Despite extensive study, the structural details of much of the invasion process remain unclear.  
125 Most of the previous work relied on low-resolution imaging methods or conventional electron  
126 microscopy preparations, in which dehydration and fixation disrupt cell membranes and obscure  
127 macromolecular details. Cryogenic electron tomography (cryo-ET) allows the investigation of  
128 cellular processes in a fully-hydrated frozen state with macromolecular resolution (Ghosal et al.,  
129 2019a; Kaplan et al., 2021a; Oikonomou and Jensen, 2017), but so far it has only been applied to  
130 study the ultrastructure of individual *B. bacteriovorus* cells in the attack phase. While these studies  
131 revealed important structural features of this stage (Borgnia et al., 2008; Butan et al., 2011; Fenton  
132 et al., 2010b), much remains to be learned about the full invasion cycle of *B. bacteriovorus*.

133

134 Here, we used cryo-ET to image the predation cycle of *B. bacteriovorus* invading three types of  
135 prey: *Vibrio cholerae*, *Escherichia coli*, and *E. coli* minicells. Our work reveals, for the first time,

136 the macromolecular details of each stage of the *B. bacteriovorus* lifecycle and uncovers several  
137 unexpected features of the process, including absorption of the extracellular flagellum into the  
138 predator's periplasm during attachment, a flexible portal structure associated with the prey  
139 peptidoglycan surrounding the predator during entry, and formation of a ribosome lattice around  
140 the predator's nucleoid after the prey is consumed in the bdelloplast.

141

142



## 143 **Results**

144 To visualize the predatory lifecycle of *B. bacteriovorus* in a near-native state, we applied cryo-ET  
145 imaging to samples of *B. bacteriovorus* HD100 at various timepoints, from 10 minutes to 16 hours,  
146 after addition of prey (*Vibrio cholerae*, *Escherichia coli*, or *E. coli* minicells). Compared to thicker  
147 cells, the thinness of *E. coli* minicells yielded higher-resolution details about the predator-prey  
148 interaction. The small size of the minicells also prevented complete entry of the predator, allowing  
149 us to capture otherwise fleeting intermediates in the rapid invasion process. Table S1 lists the  
150 number of cryo-tomograms we acquired at each stage of the predatory lifecycle of *B. bacteriovorus*,  
151 and Table S2 the number of examples we observed of each of the features described below.

152

### 153 **I- Anatomy of the attack-phase *B. bacteriovorus* cell**

154 Our cryo-tomograms of attack-phase *B. bacteriovorus* showed features previously described,  
155 including a compact spiral nucleoid occupying the center of the cell (Fig. 1A) (Borgnia et al., 2008;  
156 Butan et al., 2011). While the nucleoid excluded ribosomes, they were occasionally abundant at  
157 its periphery (Fig. S1 and Movie S1), as seen previously by cryo-ET (Borgnia et al., 2008; Butan  
158 et al., 2011). Again consistent with previous cryo-ET of attack-phase cells (Borgnia et al., 2008),  
159 we saw unidentified tubes (on average, two per cell) in the cytoplasm. The tubes had a uniform  
160 diameter of ~8 nm and were typically a few tens of nanometers in length (Fig. S2). Each cell  
161 contained a single polar flagellum, sheathed in outer membrane (Fig. 1A), and subtomogram  
162 averaging of 79 particles revealed that the structure of the flagellar motor is similar to that recently  
163 published from a host-independent strain of *B. bacteriovorus* (Chaban et al., 2018) (Fig. 1B).

164

165 We also saw novel features, including extracellular vesicles with a uniform diameter of ~25 nm  
166 near cells (Fig. S3A). On the “biting” pole opposite the flagellum, we noted several characteristic  
167 features that have not been described before. Rarely, we saw spherical and short filamentous  
168 structures in the periplasm (Figs. 1A and S3B). We observed abundant, thin (~3-4 nm wide)  
169 fimbriae on the cell surface, with lengths ranging from ~50 to more than 100 nm (Fig. S3A&C).  
170 We also observed a novel complex, spanning the periplasm and with a prominent extracellular  
171 rosette of density. We call this unidentified structure the “rose-like complex.” On average, each  
172 cell had 2-3 rose-like complexes at the biting pole (Fig. 1A). Subtomogram averaging of 132  
173 particles revealed a molecular complex spanning the entire periplasmic space with associated  
174 cytoplasmic densities (a ring ~17 nm in diameter) and extensive extracellular densities. Five  
175 distinct extracellular densities could be distinguished in cross-section: two stacked rings and a  
176 central cap (Fig. 1C).

177

178 We observed both piliated and non-piliated T4aP basal bodies on the biting pole (Figs. 1A and S4  
179 and S5), with empty more abundant than piliated (Table S2). A subtomogram average of 335 non-  
180 piliated T4aP basal bodies revealed the architecture, including a distinctive extracellular ring  
181 present in both non-piliated and piliated basal bodies (Figs. 1D and S4) which was not seen in  
182 subtomogram averages of T4P in other species (Chang et al., 2016, 2017; Gold et al., 2015;  
183 Treuner-Lange et al., 2020). While all piliated basal bodies had the ring, not all non-piliated basal  
184 bodies did (Fig. S5). This could either be because the external ring had disassembled or not yet  
185 assembled, or because these structures were not in fact T4aP but rather, e.g. T4bP, which are also  
186 involved in adhesion to prey (Avidan et al., 2017). In addition, classifying the non-piliated T4aP  
187 using principal component analysis revealed that ~1/2 of the particles had only the Secretin outer

188 membrane channel and extracellular ring and lacked the lower periplasmic ring (Fig. S6). This  
189 might reflect different assembly stages, as it has been shown that T4P in other species utilize an  
190 outside-in assembly pathway starting from the Secretin (Friedrich et al., 2014).

191

## 192 **II- Attachment of *B. bacteriovorus* to prey**

193 We observed attachment of *B. bacteriovorus* to *V. cholerae* and *E. coli* minicells (of various sizes).  
194 The earliest event we identified was connection of *B. bacteriovorus* to prey by T4aP, with the tip  
195 of the extended pilus clearly in contact with the prey's outer membrane. At the resolution of our  
196 cryo-tomograms, no distinctive features were visible at the pilus-prey attachment point (Fig. 2A).  
197 Occasionally, we also saw thin fimbriae apparently contacting the outer membrane of the prey cell  
198 (Fig. S7).

199

200 Next, we observed predator and prey in close apposition. In some cases, pilus attachments were  
201 still visible; in others the pili had retracted completely. In all cases, we observed non-piliated T4aP  
202 basal bodies aligned at the contact site, with rose-like complexes nearby (Figs. 2B and S8). In  
203 several attachments to *E. coli* minicells, where finer detail could be resolved, we observed that the  
204 non-piliated T4aP basal bodies extended through the prey outer membrane, with their extracellular  
205 rings apparently embedded in the prey peptidoglycan (PG) (Figs. 2B and S9). At this stage, we  
206 began to observe enlargement of the prey periplasm. In agreement with previous studies (Lambert  
207 et al., 2011), with rod-shaped prey the contact site was usually located on the side of the prey cell,  
208 and on the pole of the predator (Fig. S10A). In some cases, particularly with smaller, spherical *E.*  
209 *coli* minicells, the attachment site was displaced slightly off the biting pole onto the side of the  
210 predator (Fig. S10B-D).

211  
212 In the next stage, we observed an electron-dense but relatively unstructured plaque of material  
213 (henceforth referred to as the “attachment plaque”) at the contact point between the predator and  
214 the prey. The diameter of this plaque ranged from 15-70 nm and the thickness usually extended  
215 from the predator’s OM to the prey’s PG cell wall (Figs. 2C, S10C and D), suggesting a  
216 modification of the prey cell wall at the predator-prey contact point in agreement with previous  
217 reports (Kuru et al., 2017). We often observed nonpiliated T4aP basal bodies near or in the plaque  
218 (Fig. S10D), as well as rose-like complexes and, very occasionally, prey-attached pili nearby.  
219 While we sometimes observed two or even three *B. bacteriovorus* attached to the same prey cell  
220 with T4aP, only one ever formed an attachment plaque, consistent with the committed attachment  
221 observed in previous studies (Fig. S11).

222  
223 At around the same time that the attachment plaque formed at the biting pole, an unexpected  
224 process began at the other pole. The sheathed flagellum of the *B. bacteriovorus* was resorbed into  
225 the periplasmic space, wrapping around the cell. The process seems to initiate with breakage of  
226 the flagellar motor at its OM-embedded ring (the L- (lipopolysaccharide) ring, Fig. S12). The L-  
227 ring remained in the OM. Early in the process, the P- (peptidoglycan) ring was still visible around  
228 the flagellar rod but was located more than 20 nm from the OM, compared to 10-11 nm in attack-  
229 phase cells (Figs. S13 and S14 and Movie S2). Consistent with a decoupling of the P- and L-rings,  
230 we observed two examples of *B. bacteriovorus* cells attached to prey with a plaque and with  
231 disrupted OM around the flagellum; in both cases, only the P-ring, and not the L-ring, was visible  
232 surrounding the rod of the motor (Fig. S15).

233

234 As flagellar resorption continued, the motor (lacking the L-ring but including the P-ring and rod)  
235 was completely internalized to the periplasm and moved off the cell pole, with the hook and basal  
236 portion of the filament entering the periplasm (Figs. 3, S16 and Movie S3). The L-ring still  
237 encircled the filament at the junction of OM and flagellar sheath (Figs. 3, S16 and Movie S3).  
238 Eventually, most or all of the filament was internalized to the periplasm, wrapping around the cell  
239 (Figs. S17, S18 and Movies S4-S7). In some cases, we saw the motor further up the side of the  
240 cell. In other cases, we could not find the motor, either because it was degraded or because it was  
241 located in a part of the cell not visible due to the effect of the missing wedge of information in  
242 cryo-ET (Baumeister, 1999). During the absorption process, the exit point of the flagellum  
243 sometimes shifted from the pole up the side of the cell (Figs. S18, S19 and Movie S6). In cells  
244 with fully internalized filaments, we could no longer identify L-rings in the outer membrane. In  
245 some cases, the wrapped filament broke in the periplasm (Movie S4). Figure S20 summarizes this  
246 absorption process based on our cryo-ET data.

247

248 Chemosensory arrays remained visible throughout the attachment phase, although they appeared  
249 to be partially degraded (smaller in diameter than in attack-phase cells) in some cases. As in attack-  
250 phase cells, we observed small, uniformly-sized membrane vesicles in the vicinity of the predator  
251 and attached prey (Fig. S21). In some vesicles, densities were visible either inside and/or on the  
252 surface (Fig. S21F). We also saw vesicles near the sheath of the flagellum during resorption (Fig.  
253 S22).

254

255 **III- Invasion of the prey periplasm**

256 We captured 18 cryo-tomograms of stalled invasions of *B. bacteriovorus* entering the periplasm  
257 of *E. coli* minicells. Note that in these stalled invasions we do not know how long before sample  
258 freezing a particular predator entered its prey or whether the non-permissive size of the small prey  
259 had incidental effects on the entry process. Still, this paradigm provided an unique opportunity to  
260 view fleeting stages of invasion at high resolution. In invasion, the attachment plaque at the contact  
261 site was replaced by a portal structure through which the predator entered the prey periplasm (Figs.  
262 4, S23, and Movie S8). This portal ring, which bridged the outer membranes of predator and prey,  
263 appeared in cross-section as a thin (<5 nm), dark density extending from the prey's PG layer to the  
264 outside of the cell, capping the open end of the prey outer membrane (Figs. 4A and S23A). The  
265 height of the portal in cross-section, on the order of a few tens of nanometers, varied between cells,  
266 and even on opposite sides of the same cell (e.g. compare Figs. 4A and S23A). In eight examples,  
267 we observed what appeared to be prey OM blebbing out from the portal (Movie S9). Consistent  
268 with a water-tight seal model, the portal appeared to exert considerable force on the *B.*  
269 *bacteriovorus* cell, as previously observed (Abram et al., 1974), reducing the distance between the  
270 outer and inner membranes by ~50% at the entry point compared to elsewhere in the cell, and  
271 constricting the deformation-resistant cell wall (Figs. 4B-C, S23B-C). Consistent with previous  
272 reports of cell flexibility (Borgnia et al., 2008), we observed that *B. bacteriovorus* could bend  
273 considerably to maximally occupy the prey periplasm (Fig. 4A).

274

275 In all stalled invasions, we observed that the *B. bacteriovorus* cells had fully degraded their  
276 absorbed periplasmic flagella and lacked rose-like complexes and fimbriae. Chemosensory arrays  
277 were also partially or completely degraded (Fig. S24). Interestingly, while complexes  
278 morphologically similar to non-piliated T4aP basal bodies were still present in the predator, they

279 lacked the characteristic extracellular ring found at earlier stages of invasion (Fig. S25), and were  
280 less abundant than T4aP basal bodies in attack-phase cells. This could be because either the  
281 extracellular ring is lost during the invasion process, or these are different complexes, e.g. type II  
282 secretion systems.

283  
284 In two examples where a non-flagellated *B. bacteriovorus* cell was in the vicinity of a lysed prey,  
285 we observed knob-like densities on the predator's biting pole (Fig. S26). Given the lysed prey cell  
286 nearby and the lack of attack-phase structures such as flagella or chemosensory arrays in the *B.*  
287 *bacteriovorus*, we think it likely that these cells were pulled out of the prey post-invasion during  
288 sample preparation. When present, the knob-like structures could be abundant; we identified 23  
289 examples on one cell (Table S2). While leg-like densities could be seen extending from the  
290 extracellular domains to the PG layer in individual examples, subtomogram averaging failed to  
291 resolve a consistent structure, suggesting flexibility or differing stoichiometry.

292  
293 Even though entry was incomplete, *B. bacteriovorus* in stalled invasions of *E. coli* minicells  
294 showed signs of entering growth phase. Some predators had at least partially decondensed their  
295 nucleoids, and the prey cytoplasm was considerably reduced in size, presumably consumed by the  
296 predator. Perhaps related to this digestion, we observed multiple vesicles with a consistent size of  
297 ~25 nm in the prey periplasm (Figs. 4A and S23A). We cannot tell whether they originated from  
298 prey or predator membrane, but their size is identical to those we observed in the vicinity of  
299 isolated attack-phase and prey-attached *B. bacteriovorus*.

300

301 **IV- Growth phase in the bdelloplast**

302 We captured 54 cryo-tomograms of the bdelloplast stage from samples of *B. bacteriovorus*  
303 invading *V. cholerae* cells and *E. coli* minicells large enough to accommodate the entire predator.  
304 Once the predator fully entered the prey's periplasm, the entry hole was sealed by a scar consisting  
305 of an extracellular bubble of what appeared to be membrane and an amorphous electron density  
306 associated with the prey OM and PG beneath it (Figs. 5, S27 and S28 and Movies S10-S13). In  
307 invaded *V. cholerae*, the prey's (non-functional) flagellum remained attached to the bdelloplast  
308 (Figs. 5F and S27B, C). The flagellum remained connected to the part of the motor embedded in  
309 the OM and PG: the PL-rings and part of the rod. Presumably these parts were separated from the  
310 rest of the motor by periplasmic expansion. We did not observe any motor components still  
311 associated with the inner membrane. The fact that flagellar relics remained only on *V. cholerae*  
312 bdelloplasts, and not *E. coli*, could be because the flagellar sheath aids in retention. In *V. cholerae*  
313 bdelloplasts, we sometimes also observed PL-subcomplexes (without associated filaments)  
314 resulting from previous flagellar loss events (Ferreira et al., 2019; Kaplan et al., 2020) (Fig. S27B).  
315  
316 In predators inside bdelloplasts, we saw neither chemosensory arrays nor any relics of flagella,  
317 although we occasionally observed filamentous structures in the periplasm that may be remnants  
318 of flagellar digestion (Fig. S29). We also sometimes observed these in (flagellated) attack-phase  
319 cells (Fig. S3B). Interestingly, they were always located at the pole (the biting pole of attack-phase  
320 cells), perhaps reflecting spatial differences in proteolysis. We also could not find any rose-like  
321 complexes or T4aP basal bodies with external rings in *B. bacteriovorus* inside bdelloplasts. As in  
322 stalled invasions, we did identify putative nonpiliated T4aP basal bodies lacking the external ring.  
323 Again, they were less abundant than in attack-phase cells; from 47 cryo-tomograms of stalled  
324 invasions or early bdelloplasts, we identified 25 such particles (Table S2). We did occasionally



325 observe 8-nm-wide cytoplasmic tubes, as seen in other lifecycle stages (Figs. S30). In addition, we  
326 saw variously-sized spherical, nested and horseshoe-shaped vesicles in the predator's cytoplasm,  
327 morphologically similar to those reported in other species (Dobro et al., 2017) (Fig. S31).

328

329 As in stalled invasions of *E. coli* minicells, we observed many uniformly-sized (~25 nm) vesicles  
330 in the bdelloplast periplasm (Figs. 5 and S31 and Movies S11-S13). Consistent with active growth,  
331 *B. bacteriovorus* nucleoids were less condensed than in earlier stages and, in concert with the prey  
332 cytoplasm shrinking, the predator cell elongated and curled to fill most of the bdelloplast (Fig.  
333 S32). Contrary to previous observations by traditional EM (Abram et al., 1974), we could not  
334 unambiguously identify a connection between the predator OM and prey inner membrane (Figs.  
335 S28, S32, S33 and Movies S10-S11).

336

337 When nearly all of the prey cytoplasm was consumed, the elongated *B. bacteriovorus* cell divided.  
338 The number of progeny depends on the size of the bdelloplast (Fenton et al., 2010a), and we  
339 observed two or three progeny cells in *E. coli* and *V. cholerae* prey (e.g., Fig. 5). In a few cases,  
340 division produced an extra, small spherical product, in accordance with previous reports (Burnham  
341 et al., 1970) (Fig. S34). In some cases, bdelloplasts contained a very dense sphere of material,  
342 presumably containing the remnants of the prey cytoplasm (Figs. 5 and S34). In other cases, not  
343 even this remained (a characteristic we use to define an "end-stage bdelloplast"). The characteristic  
344 ~25 nm vesicles, however, were still present in end-stage bdelloplasts even after no prey cytoplasm  
345 remained.

346

347 In some elongated or divided *B. bacteriovorus* in end-stage bdelloplasts of *E. coli*, we observed a  
348 remarkable hexagonal lattice of ribosomes coating the nucleoid (Fig. 6 and Movies S13-S17). The  
349 lattice spacing was ~20 nm, consistent with maximally dense packing of ribosomes (Fig. S35).  
350 This arrangement was much more extensive than we and others observed in attack-phase cells  
351 (Butan et al., 2011). We measured the distances from ribosomes to the apparent surface of the  
352 nucleoid in two tomograms. Of 2,304 ribosomes in one (Fig. 6) and 1,109 in the other (Fig. S36),  
353 ~80% were located within 10 nm of the nucleoid surface. By comparison, in a simulation of the  
354 same number of randomly-packed 20-nm spheres in the same tomographic volumes (see Materials  
355 and Methods), only ~20-25% were expected to be located within 10 nm of the nucleoid surface  
356 (Figs. 6E and S36), suggesting that the association we observed does not arise simply by chance.  
357 To investigate whether the ordered ribosomes shared the same orientation, we produced an ~4.7  
358 nm-resolution subtomogram average of the ribosomes in a *B. bacteriovorus* cell and mapped it  
359 back into the tomographic volume using the positions and orientations determined during  
360 averaging. We found that individual particles were apparently randomly oriented on the nucleoid  
361 surface (Fig. S37).  
362  
363 Movie S18 offers an animated summary of all stages of the *B. bacteriovorus* predatory lifecycle  
364 that we observed in this study.

## 365 **Discussion**

366 Here we used cryo-ET imaging to reveal the predation cycle of *B. bacteriovorus in situ* at  
367 nanometer-scale resolution (Movie S18). Our results contextualize decades of research on BALO  
368 predation and uncover many surprising new details of the process.

369

370 In addition to previously-characterized structures in attack-phase cells such as the flagellum, poly-  
371 phosphate storage granules, highly-condensed nucleoid, chemosensory array, and type IV pili  
372 (Borgnia et al., 2008; Butan et al., 2011; Chaban et al., 2018; Evans et al., 2007; Mahmoud and  
373 Koval, 2010), we observed several unidentified structures. At all stages of invasion, *B.*  
374 *bacteriovorus* cells contained 8 nm-wide cytoplasmic tubes, typically two per cell. The identity  
375 and function of these tubes, which were also seen previously by cryo-ET in attack-phase cells  
376 (Borgnia et al., 2008), remains unknown, but they may serve a cytoskeletal role. In a few attack-  
377 phase cells, we observed spherical or tubular structures in the periplasm at the biting pole which  
378 might be fragments of digested flagella. The biting pole of attack-phase cells also contained  
379 abundant fimbriae, shorter (~100 nm or less) and thinner than T4aP and without obvious  
380 machinery at their base. Their location suggests a role in prey interaction. Interestingly, mutant  
381 strains of *B. bacteriovorus* lacking either T4aP and T4bP genes can still attach to prey (Avidan et  
382 al., 2017; Milner et al., 2014); perhaps these fimbriae mediate such adhesion.

383

384 The most intriguing new structure we observed is what we call the rose-like complex, present in  
385 ~2-3 copies on the biting pole of nearly every attack-phase cell we imaged. The periplasmic portion  
386 of the rose-like complex is morphologically similar to a recent structure of a tripartite efflux pump  
387 (Alav et al., 2021) and since related *B. bacteriovorus* type I secretion systems (T1SS) secrete

388 enzymes that modify the prey during invasion (Rendulic, 2004), it is possible that the rose-like  
389 complex is a TISS. Consistent with a role in early invasion, we observed rose-like complexes on  
390 attack-phase cells and at prey contact sites, but not in cells during or after invasion. The function  
391 of the elaborate extracellular domains extending nearly 20 nm out from the cell is of particular  
392 interest; perhaps they interact with, or breach, the prey envelope.

393

394 Another machine with a notable extracellular domain is the T4aP basal body. The pili observed on  
395 the biting pole of *B. bacteriovorus* in early micrographs (Abram and Davis, 1970; Abram et al.,  
396 1974; Shilo, 1969) were previously identified as T4aP by mutant analysis and immunolocalization  
397 (Evans et al., 2007; Mahmoud and Koval, 2010). Our higher-resolution imaging here revealed a  
398 novel extracellular ring surrounding the base of the pilus, not seen in previous subtomogram  
399 averages of related T4aP in *Thermus thermophilus* and *Myxococcus xanthus* (Chang et al., 2016;  
400 Gold et al., 2015). The ring was also present in non-piliated basal bodies, indicating that it is stable  
401 in the absence of the pilus. Interestingly, these extracellular densities were observed on attack-  
402 phase cells in a previous cryo-ET study, but their relation to T4aP was not resolved (Borgnia et al.,  
403 2008). We observed some non-piliated complexes lacking the extracellular ring, both in attack-  
404 phase cells and in bdelloplasts, where no complexes with the outer ring were observed. It is  
405 possible that these complexes are not T4aP, but rather a related machine containing a Secretin pore  
406 in the outer membrane, such as a type II secretion system, which is structurally similar (Ghosal et  
407 al., 2019b) and thought to be involved in *B. bacteriovorus* secretion (Dori-Bachash et al., 2008;  
408 Rendulic, 2004). In addition, *B. bacteriovorus* also contains a large repertoire of T4bP genes,  
409 which are dispensable for attachment but required for invasion (Avidan et al., 2017; Schwudke et  
410 al., 2005). Their products have not been located on the cell and it is possible that some or all of the

411 ring-less basal bodies we saw were T4bP. Alternatively, the extracellular ring may be a transient  
412 component of the *B. bacteriovorus* T4aP, perhaps dissociating during the prey entry process.

413

414 The pilin protein PilA is required for invasion and T4aP have been suggested to pull cells into prey,  
415 perhaps by attaching to the cell wall (Evans et al., 2007; Mahmoud and Koval, 2010; Milner et al.,  
416 2014), but mutants lacking the disassembly PilT ATPase are still capable of invasion (Chanyi and  
417 Koval, 2014) and the role of T4aP in the process remains a major open question in the field  
418 (Sockett, 2009). In our tomograms, multiple T4aP can be seen attached to prey cells and clearly  
419 exerting force as they retracted, pulling the prey OM and PG into close contact with the predator.  
420 As the membranes were brought into contact, the shortening pili fully disassembled, leaving empty  
421 basal bodies. Interestingly, these non-piliated basal bodies continued to mediate attachment and  
422 could be seen extending through the prey OM, with their extracellular rings located in the PG layer  
423 of the prey, suggesting the function of this novel component. Our results thus suggest that pili  
424 themselves do not drive entry, but rather force the initial connection. If the basal bodies without  
425 external rings we observed in bdelloplasts were in fact T4aP, it is possible that the rings remained  
426 embedded in the prey PG.

427

428 With a few exceptions noted by (Lambert et al., 2006), *B. bacteriovorus* are known to lose their  
429 flagella when entering prey. Our images reveal a surprising mechanism: while attached to a prey  
430 cell, the flagellar motor is broken at the L-ring and the filament absorbed into the predator's  
431 periplasm, where it is digested. This mechanism differs from all previous observations of flagellar  
432 loss due to lifecycle-programmed ejection, response to nutrient deprivation or mechanical  
433 breakage, all of which leave a stable subcomplex of the P- and L-rings in the cell wall and outer

434 membrane (Ferreira et al., 2019; Kaplan et al., 2019, 2020, 2021b, 2021b; Zhu and Gao, 2020;  
435 Zhu et al., 2019; Zhuang and Lo, 2020; Zhuang et al., 2020). It will be interesting to see whether  
436 the *B. bacteriovorus* motor lacks the inter-subunit interactions that likely stabilize the PL-  
437 subcomplex in other species (Johnson et al., 2021; Tan et al., 2021; Yamaguchi et al., 2020). This  
438 process also differs from the breakage of the prey flagellum that occurs as the periplasmic space  
439 is expanded into the bdelloplast. In that case, we see that the flagellum remains anchored to the  
440 cell by a stub of the motor embedded in the outer membrane. Why the hook/filament is not lost is  
441 unclear; perhaps it is locked into the remodeled PG. This process is reminiscent of that recently  
442 observed in other species upon cell lysis, where the cytoplasmic flagellar switch complex is lost,  
443 while the periplasmic and extracellular components remain (Kaplan et al., 2021c).

444

445 How does *B. bacteriovorus* absorb its flagellum into the periplasm? It is unlikely to be pulled from  
446 the motor, which we occasionally saw drift partway up the side of the cell before being fully  
447 degraded. Our observation of filaments partially absorbed up to a junction on the side of the cell  
448 suggests that the process involves zippering of the flagellar sheath and the outer membrane.  
449 Perhaps this is related to the unique lipid composition of the sheath, which is predicted to be even  
450 more fluid than the rest of the outer membrane (Thomashow and Rittenberg, 1985b). The vesicles  
451 we observed in the vicinity of some absorbed flagella are consistent with previous reports that  
452 rotation of sheathed flagella can lead to shedding of outer membrane vesicles (Aschtgen et al.,  
453 2016; Brennan et al., 2014). However, we do not know whether the vesicles formed because the  
454 motor was still rotating during absorption or due to the absorption process itself.

455

456 Other bacterial species have been observed to wrap their extracellular (unsheathed) flagella around  
457 themselves (Alirezaeizanjani et al., 2020; Cohen et al., 2020; Constantino et al., 2018; Hintsche et  
458 al., 2017; Kühn et al., 2017; Tian et al., 2022). This behavior, which *Shewanella putrefaciens* uses  
459 to burrow back out of a tight spot when stuck, is triggered by a mechanical instability in the  
460 flagellum that buckles it when the cell can no longer move to alleviate the torque of flagellar  
461 rotation (Kühn et al., 2017). Such a situation likely occurs when a *B. bacteriovorus* cell attaches  
462 to a prey. Brief continuing flagellar rotation could conceivably wrap the filament around the cell,  
463 where fusion of the outer membrane and sheath would bring it into the periplasm. Such increased  
464 resistance is consistent with the lateral shift of the biting pole we sometimes observed on attached  
465 *B. bacteriovorus* cells. Interestingly, it was recently shown that a discontinuous flagellar filament  
466 formed by two different flagellins facilitates screw-like motility in *S. putrefaciens* (Kühn et al.,  
467 2018), and is key to wrapping in *Campylobacter jejuni* (Cohen et al., 2020). Multiple flagellins  
468 similarly make up distinct segments of the *B. bacteriovorus* flagellum (Thomashow and Rittenberg,  
469 1985a); the reason for this was unknown but now we speculate that it may facilitate flagellar  
470 recycling.

471  
472 A major open question is the nature of the pore through which *B. bacteriovorus* enter their prey.  
473 Secreted PG-remodeling enzymes, presumably part of the dense plaque we observe at the  
474 attachment site that extends to the prey cell wall, are known to create, and subsequently seal, a  
475 reinforced circular porthole in the prey PG (see figures 2 and 3 in (Kuru et al., 2017)). How the  
476 prey outer membrane is modified remains more of a mystery. Prey cells remain intact and  
477 transcriptionally active throughout the initial entry process (Lambert et al., 2010a), so it was  
478 proposed that the membranes of prey and predator must fuse (Negus et al., 2017). Instead, we

479 observed what seems to be a proteinaceous collar curving out from the prey PG to seal the hole in  
480 the outer membrane and prevent interaction of the two membranes. Presumably this structure is  
481 associated with the PG remodeling enzymes, and may even be a modified and reinforced extension  
482 of the cell wall, as suggested by (Abram et al., 1974). The portal is dynamic, expanding and  
483 contracting to match the cross-section of the cell passing through it, and its height varied between  
484 cells (and even on opposite sides of the same cell). As was also seen by traditional thin-section  
485 TEM (Abram et al., 1974), the portal exerted considerable force on the *B. bacteriovorus* cell,  
486 deforming its PG layer, consistent with a water-tight seal between the cells.

487  
488 What provides the force for entry remains enigmatic. Over several decades, various models have  
489 been proposed, including flagellar rotation (Stolp and Starr, 1963), retraction of T4aP attached to  
490 the prey cell wall (Evans et al., 2007; Mahmoud and Koval, 2010), and attachment to the prey  
491 inner membrane as osmotic pressure rapidly expands the periplasm (Abram et al., 1974). Our  
492 results rule out all of these models. We see that the *B. bacteriovorus* flagellum is broken, and at  
493 least partially absorbed, prior to entry. Similarly, pili are fully disassembled prior to entry. And  
494 finally, we see prey periplasmic expansion even before entry, presumably due to secreted enzymes  
495 that de-crosslink and sculpt the prey PG during entry (Lerner et al., 2012), with no visible  
496 connection between the predator and the now-distant prey inner membrane. It is possible that an  
497 expanding periplasmic space provides a suction force. It is also possible that an active mechanism  
498 walks the connection point with the portal down the *B. bacteriovorus* cell.

499  
500 Following predator entry, we saw that the portal is sealed by a scar of electron dense material,  
501 likely related to the resealing of the PG sacculus (Kuru et al., 2017; Snellen and Starr, 1974), with



502 a protruding bubble of what appears to be membrane. While previous, traditional EM imaging also  
503 observed an electron-dense ring at the sealed penetration pore (Shilo, 1969), no associated bubble  
504 was observed, perhaps reflecting the improved preservation and hydration of membrane structures  
505 by cryo-EM. Given the blebs around the invasion portal we noticed on some prey cells in stalled  
506 invasions, it may be prey OM. Alternatively, it may be outer membrane pinched off from the end  
507 of the invading predator. *B. bacteriovorus* has a highly labile OM, as we saw both with absorption  
508 of the sheathed flagellum and in occasional highly-curved cells where the outer membrane fused  
509 into a sac, and consistent with previous lipid analysis of its unique membrane (Lambert et al.,  
510 2008). In either case, the bubble must be somehow tethered to the seal, perhaps through membrane-  
511 embedded protein complexes.

512

513 While we did not see the connections to the prey cytoplasm during entry observed by (Abram et  
514 al., 1974), we did see a few examples of the predator outer and prey inner membranes in close  
515 proximity in the bdelloplast. In most cases, however, we only observed vesicles in the bdelloplast  
516 periplasm, suggesting that this may be a mechanism for nutrient transfer. Compared to membrane  
517 vesicles of other species (Kaplan et al., 2021d; Toyofuku et al., 2019), these vesicles were notable  
518 for their relatively small and uniform size (~25 nm in diameter). Similar small periplasmic vesicles  
519 may be present in previous traditional EM images, but interpretation is limited by the membrane  
520 disruption of that sample preparation (Abram et al., 1974). In our tomograms, we cannot tell which  
521 cell(s) are producing the vesicles in bdelloplasts, but we also observed them near isolated attack-  
522 phase cells as well as budding from *B. bacteriovorus* attached to prey. We also observed them in  
523 end-stage bdelloplasts where no remaining prey inner membrane was visible. *B. bacteriovorus* is  
524 known to translocate a pore protein from its outer membrane to the prey inner membrane (Tudor

525 and Karp, 1994); perhaps similar transferred machinery produces vesicles to deliver prey  
526 cytoplasmic content, and lipids, to the growing predator.

527

528 Following complete consumption of the prey, we observed a striking hexagonal lattice of  
529 ribosomes on the surface of the *B. bacteriovorus* condensed nucleoid(s). Similar, though more  
530 limited, ribosome associations were previously observed in attack phase, particularly in a *B.*  
531 *bacteriovorus* mutant with an even more tightly condensed nucleoid than wild-type cells (Borgnia  
532 et al., 2008; Butan et al., 2011), and in some attack-phase cells in this study. One possibility for  
533 this ribosome lattice is that it is a depletion effect resulting from entropic forces encouraging large  
534 objects to aggregate on a surface (Asakura and Oosawa, 1954, 1958; Rocha et al., 2020). However,  
535 we did not observe the effect on other cell surfaces such as the inner membrane, nor in other stages  
536 of the cell cycle, so we think this unlikely. Eukaryotic ribosomes have been observed to crystallize  
537 in hypothermic conditions (Byers, 1967), but we see no relationship between the orientation of  
538 neighboring particles consistent with a crystal, or with a polysome (Brandt et al., 2009). We think  
539 a more likely possibility is that the ribosomes are independently translating transcripts from the  
540 condensing nucleoid. The switch from growth phase to attack phase involves a transcriptional shift  
541 activating a few hundred genes, and inactivating many more (Karunker et al., 2013; Lambert et al.,  
542 2010b). The highly condensed attack-phase nucleoid excludes even small monomeric proteins  
543 (Kaljević et al., 2021), so the ribosomes we observe on the surface may be, or recently have been,  
544 coupled to transcribing polymerases.

545

546 Together, our results provide the most complete view to date of the unique structures that enable  
547 the complex lifecycle of this endobiotic bacterial predator, and raise new questions. We hope our

548 work spurs further study of this fascinating process and informs potential future applications of  
549 bacterial predators as living antibiotics (Atterbury and Tyson, 2021).

## 550 References

- 551 Abram, D., and Davis, B.K. (1970). Structural Properties and Features of Parasitic *Bdellovibrio*  
552 *bacteriovorus*. *J Bacteriol* 104, 948–965. <https://doi.org/10.1128/jb.104.2.948-965.1970>.
- 553 Abram, D., e Melo, J.C., and Chou, D. (1974). Penetration of *Bdellovibrio bacteriovorus* into  
554 Host Cells. *J Bacteriol* 118, 663–680. <https://doi.org/10.1128/jb.118.2.663-680.1974>.
- 555 Alav, I., Kobyłka, J., Kuth, M.S., Pos, K.M., Picard, M., Blair, J.M.A., and Bavro, V.N. (2021).  
556 Structure, Assembly, and Function of Tripartite Efflux and Type 1 Secretion Systems in Gram-  
557 Negative Bacteria. *Chem. Rev.* 121, 5479–5596. <https://doi.org/10.1021/acs.chemrev.1c00055>.
- 558 Alirezaeizanjani, Z., Großmann, R., Pfeifer, V., Hintsche, M., and Beta, C. (2020). Chemotaxis  
559 strategies of bacteria with multiple run modes. *Sci. Adv.* 6, eaaz6153.  
560 <https://doi.org/10.1126/sciadv.aaz6153>.
- 561 Asakura, S., and Oosawa, F. (1954). On Interaction between Two Bodies Immersed in a Solution  
562 of Macromolecules. *The Journal of Chemical Physics* 22, 1255–1256.  
563 <https://doi.org/10.1063/1.1740347>.
- 564 Asakura, S., and Oosawa, F. (1958). Interaction between particles suspended in solutions of  
565 macromolecules. *J. Polym. Sci.* 33, 183–192. <https://doi.org/10.1002/pol.1958.1203312618>.
- 566 Aschtgen, M.-S., Lynch, J.B., Koch, E., Schwartzman, J., McFall-Ngai, M., and Ruby, E. (2016).  
567 Rotation of *Vibrio fischeri* Flagella Produces Outer Membrane Vesicles That Induce Host  
568 Development. *Journal of Bacteriology* 198, 2156–2165. <https://doi.org/10.1128/JB.00101-16>.
- 569 Atterbury, R.J., and Tyson, J. (2021). Predatory bacteria as living antibiotics – where are we  
570 now? *Microbiology* 167. <https://doi.org/10.1099/mic.0.001025>.
- 571 Avidan, O., Petrenko, M., Becker, R., Beck, S., Linscheid, M., Pietrokovski, S., and Jurkevitch,  
572 E. (2017). Identification and Characterization of Differentially-Regulated Type IVb Pilin Genes  
573 Necessary for Predation in Obligate Bacterial Predators. *Sci Rep* 7, 1013.  
574 <https://doi.org/10.1038/s41598-017-00951-w>.
- 575 Banks, E.J., Valdivia-Delgado, M., Biboy, J., Wilson, A., Cadby, I.T., Vollmer, W., Lambert, C.,  
576 Lovering, A.L., and Sockett, R.E. (2022). Asymmetric peptidoglycan editing generates cell  
577 curvature in *Bdellovibrio* predatory bacteria. *Nat Commun* 13, 1509.  
578 <https://doi.org/10.1038/s41467-022-29007-y>.
- 579 Baumeister, W. (1999). Electron tomography of molecules and cells. *Trends in Cell Biology* 9,  
580 81–85. [https://doi.org/10.1016/S0962-8924\(98\)01423-8](https://doi.org/10.1016/S0962-8924(98)01423-8).
- 581 Bonfiglio, G., Neroni, B., Radocchia, G., Marazzato, M., Pantanella, F., and Schippa, S. (2020).  
582 Insight into the Possible Use of the Predator *Bdellovibrio bacteriovorus* as a Probiotic. *Nutrients*  
583 12, 2252. <https://doi.org/10.3390/nu12082252>.

- 584 Borgnia, M.J., Subramaniam, S., and Milne, J.L.S. (2008). Three-Dimensional Imaging of the  
585 Highly Bent Architecture of *Bdellovibrio bacteriovorus* by Using Cryo-Electron Tomography.  
586 *JB* 190, 2588–2596. <https://doi.org/10.1128/JB.01538-07>.
- 587 Brandt, F., Etchells, S.A., Ortiz, J.O., Elcock, A.H., Hartl, F.U., and Baumeister, W. (2009). The  
588 Native 3D Organization of Bacterial Polysomes. *Cell* 136, 261–271.  
589 <https://doi.org/10.1016/j.cell.2008.11.016>.
- 590 Bratanis, E., Andersson, T., Lood, R., and Bukowska-Faniband, E. (2020). Biotechnological  
591 Potential of *Bdellovibrio* and Like Organisms and Their Secreted Enzymes. *Front. Microbiol.* 11,  
592 662. <https://doi.org/10.3389/fmicb.2020.00662>.
- 593 Brennan, C.A., Hunt, J.R., Kremer, N., Krasity, B.C., Apicella, M.A., McFall-Ngai, M.J., and  
594 Ruby, E.G. (2014). A model symbiosis reveals a role for sheathed-flagellum rotation in the  
595 release of immunogenic lipopolysaccharide. *ELife* 3. <https://doi.org/10.7554/eLife.01579>.
- 596 Bukowska-Faniband, E., Andersson, T., and Lood, R. (2020). Studies on Bd0934 and Bd3507,  
597 Two Secreted Nucleases from *Bdellovibrio bacteriovorus*, Reveal Sequential Release of  
598 Nucleases during the Predatory Cycle. *J Bacteriol* 202, e00150-20, /jb/202/18/JB.00150-20.atom.  
599 <https://doi.org/10.1128/JB.00150-20>.
- 600 Burnham, J.C., Hashimoto, T., and Conti, S.F. (1968). Electron microscopic observations on the  
601 penetration of *Bdellovibrio bacteriovorus* into gram-negative bacterial hosts. *J Bacteriol* 96,  
602 1366–1381. <https://doi.org/10.1128/JB.96.4.1366-1381.1968>.
- 603 Burnham, J.C., Hashimoto, T., and Conti, S.F. (1970). Ultrastructure and Cell Division of a  
604 Facultatively Parasitic Strain of *Bdellovibrio bacteriovorus*. *J Bacteriol* 101, 997–1004.  
605 <https://doi.org/10.1128/jb.101.3.997-1004.1970>.
- 606 Butan, C., Hartnell, L.M., Fenton, A.K., Bliss, D., Sockett, R.E., Subramaniam, S., and Milne,  
607 J.L.S. (2011). Spiral Architecture of the Nucleoid in *Bdellovibrio bacteriovorus*. *Journal of*  
608 *Bacteriology* 193, 1341–1350. <https://doi.org/10.1128/JB.01061-10>.
- 609 Byers, B. (1967). Structure and formation of ribosome crystals in hypothermic chick embryo  
610 cells. *Journal of Molecular Biology* 26, 155–167. [https://doi.org/10.1016/0022-2836\(67\)90288-4](https://doi.org/10.1016/0022-2836(67)90288-4).
- 611 Calakli, F., and Taubin, G. (2012). SSD-C: Smooth Signed Distance Colored Surface  
612 Reconstruction. In *Expanding the Frontiers of Visual Analytics and Visualization*, J. Dill, R.  
613 Earnshaw, D. Kasik, J. Vince, and P.C. Wong, eds. (London: Springer London), pp. 323–338.
- 614 Capeness, M.J., Lambert, C., Lovering, A.L., Till, R., Uchida, K., Chaudhuri, R., Alderwick,  
615 L.J., Lee, D.J., Swarbreck, D., Liddell, S., et al. (2013). Activity of *Bdellovibrio* Hit Locus  
616 Proteins, Bd0108 and Bd0109, Links Type IVa Pilus Extrusion/Retraction Status to Prey-  
617 Independent Growth Signalling. *PLoS ONE* 8, e79759.  
618 <https://doi.org/10.1371/journal.pone.0079759>.

- 619 Caulton, S.G., and Lovering, A.L. (2020). Bacterial invasion and killing by predatory  
620 *Bdellovibrio* primed by predator prey cell recognition and self protection. *Current Opinion in*  
621 *Microbiology* 56, 74–80. <https://doi.org/10.1016/j.mib.2020.07.002>.
- 622 Cavallo, F.M., Jordana, L., Friedrich, A.W., Glasner, C., and van Dijk, J.M. (2021). *Bdellovibrio*  
623 *bacteriovorus* : a potential ‘living antibiotic’ to control bacterial pathogens. *Critical Reviews in*  
624 *Microbiology* 1–17. <https://doi.org/10.1080/1040841X.2021.1908956>.
- 625 Chaban, B., Coleman, I., and Beeby, M. (2018). Evolution of higher torque in *Campylobacter*-  
626 type bacterial flagellar motors. *Scientific Reports* 8. [https://doi.org/10.1038/s41598-017-18115-](https://doi.org/10.1038/s41598-017-18115-1)  
627 1.
- 628 Chang, Y.-W., Rettberg, L.A., Treuner-Lange, A., Iwasa, J., Søgaard-Andersen, L., and Jensen,  
629 G.J. (2016). Architecture of the type IVa pilus machine. *Science* 351, aad2001.  
630 <https://doi.org/10.1126/science.aad2001>.
- 631 Chang, Y.-W., Kjær, A., Ortega, D.R., Kovacicova, G., Sutherland, J.A., Rettberg, L.A., Taylor,  
632 R.K., and Jensen, G.J. (2017). Architecture of the *Vibrio cholerae* toxin-coregulated pilus  
633 machine revealed by electron cryotomography. *Nature Microbiology* 2.  
634 <https://doi.org/10.1038/nmicrobiol.2016.269>.
- 635 Chanyi, R.M., and Koval, S.F. (2014). Role of Type IV Pili in Predation by *Bdellovibrio*  
636 *bacteriovorus*. *PLoS ONE* 9, e113404. <https://doi.org/10.1371/journal.pone.0113404>.
- 637 Chen, M., Bell, J.M., Shi, X., Sun, S.Y., Wang, Z., and Ludtke, S.J. (2019). A complete data  
638 processing workflow for cryo-ET and subtomogram averaging. *Nat Methods* 16, 1161–1168.  
639 <https://doi.org/10.1038/s41592-019-0591-8>.
- 640 Chreifi, G., Chen, S., Metskas, L.A., Kaplan, M., and Jensen, G.J. (2019). Rapid tilt-series  
641 acquisition for electron cryotomography. *Journal of Structural Biology* 205, 163–169.  
642 <https://doi.org/10.1016/j.jsb.2018.12.008>.
- 643 Cohen, E.J., Nakane, D., Kabata, Y., Hendrixson, D.R., Nishizaka, T., and Beeby, M. (2020).  
644 *Campylobacter jejuni* motility integrates specialized cell shape, flagellar filament, and motor, to  
645 coordinate action of its opposed flagella. *PLoS Pathog* 16, e1008620.  
646 <https://doi.org/10.1371/journal.ppat.1008620>.
- 647 Constantino, M.A., Jabbarzadeh, M., Fu, H.C., Shen, Z., Fox, J.G., Haesebrouck, F., Linden,  
648 S.K., and Bansil, R. (2018). Bipolar lophotrichous *Helicobacter suis* combine extended and  
649 wrapped flagella bundles to exhibit multiple modes of motility. *Sci Rep* 8, 14415.  
650 <https://doi.org/10.1038/s41598-018-32686-7>.
- 651 Davidov, Y., and Jurkevitch, E. (2009). Predation between prokaryotes and the origin of  
652 eukaryotes. *BioEssays* 31, 748–757. <https://doi.org/10.1002/bies.200900018>.
- 653 Ding, H.J., Oikonomou, C.M., and Jensen, G.J. (2015). The Caltech Tomography Database and  
654 Automatic Processing Pipeline. *Journal of Structural Biology* 192, 279–286.  
655 <https://doi.org/10.1016/j.jsb.2015.06.016>.

- 656 Dobro, M.J., Oikonomou, C.M., Piper, A., Cohen, J., Guo, K., Jensen, T., Tadayon, J.,  
657 Donermeyer, J., Park, Y., Solis, B.A., et al. (2017). Uncharacterized Bacterial Structures  
658 Revealed by Electron Cryotomography. *Journal of Bacteriology* *199*.  
659 <https://doi.org/10.1128/JB.00100-17>.
- 660 Dori-Bachash, M., Dassa, B., Pietrokovski, S., and Jurkevitch, E. (2008). Proteome-Based  
661 Comparative Analyses of Growth Stages Reveal New Cell Cycle-Dependent Functions in the  
662 Predatory Bacterium *Bdellovibrio bacteriovorus*. *Appl Environ Microbiol* *74*, 7152–7162.  
663 <https://doi.org/10.1128/AEM.01736-08>.
- 664 Eisenstein, F., Danev, R., and Pilhofer, M. (2019). Improved applicability and robustness of fast  
665 cryo-electron tomography data acquisition. *Journal of Structural Biology* *208*, 107–114.  
666 <https://doi.org/10.1016/j.jsb.2019.08.006>.
- 667 Erken, M., Lutz, C., and McDougald, D. (2013). The Rise of Pathogens: Predation as a Factor  
668 Driving the Evolution of Human Pathogens in the Environment. *Microb Ecol* *65*, 860–868.  
669 <https://doi.org/10.1007/s00248-013-0189-0>.
- 670 Evans, K.J., Lambert, C., and Sockett, R.E. (2007). Predation by *Bdellovibrio bacteriovorus*  
671 HD100 Requires Type IV Pili. *JB* *189*, 4850–4859. <https://doi.org/10.1128/JB.01942-06>.
- 672 Fenton, A.K., Kanna, M., Woods, R.D., Aizawa, S.-I., and Sockett, R.E. (2010a). Shadowing the  
673 Actions of a Predator: Backlit Fluorescent Microscopy Reveals Synchronous Nonbinary  
674 Septation of Predatory *Bdellovibrio* inside Prey and Exit through Discrete *Bdelloplast* Pores. *JB*  
675 *192*, 6329–6335. <https://doi.org/10.1128/JB.00914-10>.
- 676 Fenton, A.K., Hogley, L., Butan, C., Subramaniam, S., and Sockett, R.E. (2010b). A coiled-coil-  
677 repeat protein ‘Ccrp’ in *Bdellovibrio bacteriovorus* prevents cellular indentation, but is not  
678 essential for vibroid cell morphology: CCRP protein in *Bdellovibrio*. *FEMS Microbiology*  
679 *Letters* *313*, 89–95. <https://doi.org/10.1111/j.1574-6968.2010.02125.x>.
- 680 Ferreira, J.L., Gao, F.Z., Rossmann, F.M., Nans, A., Brenzinger, S., Hosseini, R., Wilson, A.,  
681 Briegel, A., Thormann, K.M., Rosenthal, P.B., et al. (2019).  $\gamma$ -proteobacteria eject their polar  
682 flagella under nutrient depletion, retaining flagellar motor relic structures. *PLOS Biology* *17*,  
683 e3000165. <https://doi.org/10.1371/journal.pbio.3000165>.
- 684 Friedrich, C., Bulyha, I., and Søgaard-Andersen, L. (2014). Outside-In Assembly Pathway of the  
685 Type IV Pilus System in *Myxococcus xanthus*. *J Bacteriol* *196*, 378–390.  
686 <https://doi.org/10.1128/JB.01094-13>.
- 687 Ghosal, D., Kaplan, M., Chang, Y.-W., and Jensen, G.J. (2019a). In Situ Imaging and Structure  
688 Determination of Bacterial Toxin Delivery Systems Using Electron Cryotomography. In  
689 *Legionella*, C. Buchrieser, and H. Hilbi, eds. (New York, NY: Springer New York), pp. 249–  
690 265.
- 691 Ghosal, D., Kim, K.W., Zheng, H., Kaplan, M., Truchan, H.K., Lopez, A.E., McIntire, I.E.,  
692 Vogel, J.P., Cianciotto, N.P., and Jensen, G.J. (2019b). In vivo structure of the *Legionella* type II

- 693 secretion system by electron cryotomography. *Nature Microbiology*  
694 <https://doi.org/10.1038/s41564-019-0603-6>.
- 695 Gold, V.A., Salzer, R., Averhoff, B., and Kühlbrandt, W. (2015). Structure of a type IV pilus  
696 machinery in the open and closed state. *ELife* 4. <https://doi.org/10.7554/eLife.07380>.
- 697 Hagen, W.J.H., Wan, W., and Briggs, J.A.G. (2017). Implementation of a cryo-electron  
698 tomography tilt-scheme optimized for high resolution subtomogram averaging. *J. Struct. Biol.*  
699 197, 191–198. <https://doi.org/10.1016/j.jsb.2016.06.007>.
- 700 Harding, C.J., Huwiler, S.G., Somers, H., Lambert, C., Ray, L.J., Till, R., Taylor, G., Moynihan,  
701 P.J., Sockett, R.E., and Lovering, A.L. (2020). A lysozyme with altered substrate specificity  
702 facilitates prey cell exit by the periplasmic predator *Bdellovibrio bacteriovorus*. *Nat Commun* 11,  
703 4817. <https://doi.org/10.1038/s41467-020-18139-8>.
- 704 Harini, K., Ajila, V., and Hegde, S. (2013). *Bdellovibrio bacteriovorus* : A future antimicrobial  
705 agent? *J Indian Soc Periodontol* 17, 823. <https://doi.org/10.4103/0972-124X.124534>.
- 706 Heumann, J.M., Hoenger, A., and Mastrorarde, D.N. (2011). Clustering and variance maps for  
707 cryo-electron tomography using wedge-masked differences. *Journal of Structural Biology* 175,  
708 288–299. <https://doi.org/10.1016/j.jsb.2011.05.011>.
- 709 Hintsche, M., Waljor, V., Großmann, R., Kühn, M.J., Thormann, K.M., Peruani, F., and Beta, C.  
710 (2017). A polar bundle of flagella can drive bacterial swimming by pushing, pulling, or coiling  
711 around the cell body. *Sci Rep* 7, 16771. <https://doi.org/10.1038/s41598-017-16428-9>.
- 712 Hobley, L., Fung, R.K.Y., Lambert, C., Harris, M.A.T.S., Dabhi, J.M., King, S.S., Basford, S.M.,  
713 Uchida, K., Till, R., Ahmad, R., et al. (2012). Discrete Cyclic di-GMP-Dependent Control of  
714 Bacterial Predation versus Axenic Growth in *Bdellovibrio bacteriovorus*. *PLoS Pathog* 8,  
715 e1002493. <https://doi.org/10.1371/journal.ppat.1002493>.
- 716 Iebba, V., Totino, V., Santangelo, F., Gagliardi, A., Ciotoli, L., Virga, A., Ambrosi, C., Pompili,  
717 M., De Biase, R.V., Selan, L., et al. (2014). *Bdellovibrio bacteriovorus* directly attacks  
718 *Pseudomonas aeruginosa* and *Staphylococcus aureus* Cystic fibrosis isolates. *Front. Microbiol.* 5.  
719 <https://doi.org/10.3389/fmicb.2014.00280>.
- 720 Iida, Y., Hobley, L., Lambert, C., Fenton, A.K., Sockett, R.E., and Aizawa, S.-I. (2009). Roles of  
721 Multiple Flagellins in Flagellar Formation and Flagellar Growth Post *Bdelloplast* Lysis in  
722 *Bdellovibrio bacteriovorus*. *Journal of Molecular Biology* 394, 1011–1021.  
723 <https://doi.org/10.1016/j.jmb.2009.10.003>.
- 724 Jewett, A. (2021a). Jewett, AI, VISFD Software, <https://doi.org/10.5281/zenodo.5559243>.
- 725 Jewett, A. (2021b). Jewett, AI., VISFD Tutorials, <https://doi.org/10.5281/zenodo.5758648>.
- 726 Johnson, S., Furlong, E.J., Deme, J.C., Nord, A.L., Caesar, J.J.E., Chevance, F.F.V., Berry,  
727 R.M., Hughes, K.T., and Lea, S.M. (2021). Molecular structure of the intact bacterial flagellar  
728 basal body. *Nat Microbiol* 6, 712–721. <https://doi.org/10.1038/s41564-021-00895-y>.



- 729 Kaljević, J., Saaki, T.N.V., Govers, S.K., Remy, O., van Raaphorst, R., Lamot, T., and Laloux,  
730 G. (2021). Chromosome choreography during the non-binary cell cycle of a predatory bacterium.  
731 *Current Biology* 31, 3707-3720.e5. <https://doi.org/10.1016/j.cub.2021.06.024>.
- 732 Kaplan, M., Subramanian, P., Ghosal, D., Oikonomou, C.M., Pirbadian, S., Starwalt-Lee, R.,  
733 Mageswaran, S.K., Ortega, D.R., Gralnick, J.A., El-Naggar, M.Y., et al. (2019). *In situ* imaging  
734 of the bacterial flagellar motor disassembly and assembly processes. *The EMBO Journal*  
735 e100957. <https://doi.org/10.15252/embj.2018100957>.
- 736 Kaplan, M., Sweredoski, M.J., Rodrigues, J.P.G.L.M., Tocheva, E.I., Chang, Y.-W., Ortega,  
737 D.R., Beeby, M., and Jensen, G.J. (2020). Bacterial flagellar motor PL-ring disassembly  
738 subcomplexes are widespread and ancient. *Proceedings of the National Academy of Sciences*  
739 201916935. <https://doi.org/10.1073/pnas.1916935117>.
- 740 Kaplan, M., Nicolas, W.J., Zhao, W., Carter, S.D., Metskas, L.A., Chreifi, G., Ghosal, D., and  
741 Jensen, G.J. (2021a). In Situ Imaging and Structure Determination of Biomolecular Complexes  
742 Using Electron Cryo-Tomography. In *CryoEM*, T. Gonen, and B.L. Nannenga, eds. (New York,  
743 NY: Springer US), pp. 83–111.
- 744 Kaplan, M., Wang, Y., Chreifi, G., Zhang, L., Chang, Y.-W., and Jensen, G.J. (2021b).  
745 Programmed flagellar ejection in *Caulobacter crescentus* leaves PL-subcomplexes. *Journal of*  
746 *Molecular Biology* 167004. <https://doi.org/10.1016/j.jmb.2021.167004>.
- 747 Kaplan, M., Tocheva, E.I., Briegel, A., Dobro, M.J., Chang, Y.-W., Subramanian, P., McDowall,  
748 A.W., Beeby, M., and Jensen, G.J. (2021c). Loss of the Bacterial Flagellar Motor Switch  
749 Complex upon Cell Lysis. *MBio* e0029821. <https://doi.org/10.1128/mBio.00298-21>.
- 750 Kaplan, M., Chreifi, G., Metskas, L.A., Liedtke, J., Wood, C.R., Oikonomou, C.M., Nicolas,  
751 W.J., Subramanian, P., Zacharoff, L.A., Wang, Y., et al. (2021d). In situ imaging of bacterial  
752 outer membrane projections and associated protein complexes using electron cryo-tomography.  
753 *ELife* 10, e73099. <https://doi.org/10.7554/eLife.73099>.
- 754 Karunker, I., Rotem, O., Dori-Bachash, M., Jurkevitch, E., and Sorek, R. (2013). A Global  
755 Transcriptional Switch between the Attack and Growth Forms of *Bdellovibrio bacteriovorus*.  
756 *PLoS ONE* 8, e61850. <https://doi.org/10.1371/journal.pone.0061850>.
- 757 Kazhdan, M., and Hoppe, H. (2013). Screened poisson surface reconstruction. *ACM Trans.*  
758 *Graph.* 32, 1–13. <https://doi.org/10.1145/2487228.2487237>.
- 759 Kremer, J.R., Mastrorarde, D.N., and McIntosh, J.R. (1996). Computer visualization of three-  
760 dimensional image data using IMOD. *J. Struct. Biol.* 116, 71–76.  
761 <https://doi.org/10.1006/jsbi.1996.0013>.
- 762 Kühn, M.J., Schmidt, F.K., Eckhardt, B., and Thormann, K.M. (2017). Bacteria exploit a  
763 polymorphic instability of the flagellar filament to escape from traps. *Proceedings of the*  
764 *National Academy of Sciences* 114, 6340–6345. <https://doi.org/10.1073/pnas.1701644114>.

- 765 Kühn, M.J., Schmidt, F.K., Farthing, N.E., Rossmann, F.M., Helm, B., Wilson, L.G., Eckhardt,  
766 B., and Thormann, K.M. (2018). Spatial arrangement of several flagellins within bacterial  
767 flagella improves motility in different environments. *Nat Commun* 9, 5369.  
768 <https://doi.org/10.1038/s41467-018-07802-w>.
- 769 Kuru, E., Lambert, C., Rittichier, J., Till, R., Ducret, A., Derouaux, A., Gray, J., Biboy, J.,  
770 Vollmer, W., VanNieuwenhze, M., et al. (2017). Fluorescent D-amino-acids reveal bi-cellular  
771 cell wall modifications important for *Bdellovibrio bacteriovorus* predation. *Nat Microbiol* 2,  
772 1648–1657. <https://doi.org/10.1038/s41564-017-0029-y>.
- 773 Laloux, G. (2020). Shedding Light on the Cell Biology of the Predatory Bacterium *Bdellovibrio*  
774 *bacteriovorus*. *Front. Microbiol.* 10, 3136. <https://doi.org/10.3389/fmicb.2019.03136>.
- 775 Lambert, C., and Sockett, R.E. (2008). Laboratory Maintenance of *Bdellovibrio*. *Current*  
776 *Protocols in Microbiology* 9, 7B.2.1-7B.2.13.  
777 <https://doi.org/10.1002/9780471729259.mc07b02s9>.
- 778 Lambert, C., Evans, K.J., Till, R., Hobley, L., Capeness, M., Rendulic, S., Schuster, S.C.,  
779 Aizawa, S.-I., and Sockett, R.E. (2006). Characterizing the flagellar filament and the role of  
780 motility in bacterial prey-penetration by *Bdellovibrio bacteriovorus*. *Mol Microbiol* 60, 274–286.  
781 <https://doi.org/10.1111/j.1365-2958.2006.05081.x>.
- 782 Lambert, C., Hobley, L., Chang, C.-Y., Fenton, A., Capeness, M., and Sockett, L. (2008). A  
783 Predatory Patchwork: Membrane and Surface Structures of *Bdellovibrio bacteriovorus*. In  
784 *Advances in Microbial Physiology*, (Elsevier), pp. 313–361.
- 785 Lambert, C., Ivanov, P., and Sockett, R.E. (2010a). A Transcriptional “Scream” Early Response  
786 of *E. coli* Prey to Predatory Invasion by *Bdellovibrio*. *Curr Microbiol* 60, 419–427.  
787 <https://doi.org/10.1007/s00284-009-9559-8>.
- 788 Lambert, C., Chang, C.-Y., Capeness, M.J., and Sockett, R.E. (2010b). The First Bite— Profiling  
789 the Predatosome in the Bacterial Pathogen *Bdellovibrio*. *PLoS ONE* 5, e8599.  
790 <https://doi.org/10.1371/journal.pone.0008599>.
- 791 Lambert, C., Fenton, A.K., Hobley, L., and Sockett, R.E. (2011). Predatory *Bdellovibrio* bacteria  
792 use gliding motility to scout for prey on surfaces. *J Bacteriol* 193, 3139–3141.  
793 <https://doi.org/10.1128/JB.00224-11>.
- 794 Lambert, C., Cadby, I.T., Till, R., Bui, N.K., Lerner, T.R., Hughes, W.S., Lee, D.J., Alderwick,  
795 L.J., Vollmer, W., Sockett, R.E., et al. (2015). Ankyrin-mediated self-protection during cell  
796 invasion by the bacterial predator *Bdellovibrio bacteriovorus*. *Nat Commun* 6, 8884.  
797 <https://doi.org/10.1038/ncomms9884>.
- 798 Lambert, C., Lerner, T.R., Bui, N.K., Somers, H., Aizawa, S.-I., Liddell, S., Clark, A., Vollmer,  
799 W., Lovering, A.L., and Sockett, R.E. (2016). Interrupting peptidoglycan deacetylation during  
800 *Bdellovibrio* predator-prey interaction prevents ultimate destruction of prey wall, liberating  
801 bacterial-ghosts. *Sci Rep* 6, 26010. <https://doi.org/10.1038/srep26010>.

- 802 Lerner, T.R., Lovering, A.L., Bui, N.K., Uchida, K., Aizawa, S.-I., Vollmer, W., and Sockett,  
803 R.E. (2012). Specialized Peptidoglycan Hydrolases Sculpt the Intra-bacterial Niche of Predatory  
804 *Bdellovibrio* and Increase Population Fitness. *PLoS Pathog* 8, e1002524.  
805 <https://doi.org/10.1371/journal.ppat.1002524>.
- 806 Lindeberg, T. (1998). Feature Detection with Automatic Scale Selection. *International Journal of*  
807 *Computer Vision* 30, 79–116. <https://doi.org/10.1023/A:1008045108935>.
- 808 Liu, J., Chen, C.-Y., Shiomi, D., Niki, H., and Margolin, W. (2011). Visualization of  
809 bacteriophage P1 infection by cryo-electron tomography of tiny *Escherichia coli*. *Virology* 417,  
810 304–311. <https://doi.org/10.1016/j.virol.2011.06.005>.
- 811 Lyons, N.A., and Kolter, R. (2015). On the evolution of bacterial multicellularity. *Current*  
812 *Opinion in Microbiology* 24, 21–28. <https://doi.org/10.1016/j.mib.2014.12.007>.
- 813 Madhusoodanan, J. (2019). Inner Workings: Probing predatory bacteria as an antibacterial  
814 remedy. *Proc Natl Acad Sci USA* 116, 22887–22890. <https://doi.org/10.1073/pnas.1917513116>.
- 815 Mahmoud, K.K., and Koval, S.F. (2010). Characterization of type IV pili in the life cycle of the  
816 predator bacterium *Bdellovibrio*. *Microbiology* 156, 1040–1051.  
817 <https://doi.org/10.1099/mic.0.036137-0>.
- 818 Makowski, Ł., Trojanowski, D., Till, R., Lambert, C., Lowry, R., Sockett, R.E., and Zakrzewska-  
819 Czerwińska, J. (2019). Dynamics of Chromosome Replication and Its Relationship to Predatory  
820 Attack Lifestyles in *Bdellovibrio bacteriovorus*. *Appl Environ Microbiol* 85, e00730-19,  
821 /aem/85/14/AEM.00730-19.atom. <https://doi.org/10.1128/AEM.00730-19>.
- 822 Makowski, Ł., Trojanowski, D., and Zakrzewska-Czerwińska, J. (2020). Live-Cell Imaging of  
823 the Life Cycle of Bacterial Predator *Bdellovibrio bacteriovorus* using Time-Lapse Fluorescence  
824 Microscopy. *JoVE* 61105. <https://doi.org/10.3791/61105>.
- 825 Martinez-Sanchez, A., Garcia, I., Asano, S., Lucic, V., and Fernandez, J.-J. (2014). Robust  
826 membrane detection based on tensor voting for electron tomography. *Journal of Structural*  
827 *Biology* 186, 49–61. <https://doi.org/10.1016/j.jsb.2014.02.015>.
- 828 Mastronarde, D.N. (2005). Automated electron microscope tomography using robust prediction  
829 of specimen movements. *J. Struct. Biol.* 152, 36–51. <https://doi.org/10.1016/j.jsb.2005.07.007>.
- 830 Meek, R.W., Cadby, I.T., Moynihan, P.J., and Lovering, A.L. (2019). Structural basis for  
831 activation of a diguanylate cyclase required for bacterial predation in *Bdellovibrio*. *Nat Commun*  
832 10, 4086. <https://doi.org/10.1038/s41467-019-12051-6>.
- 833 Milner, D.S., Till, R., Cadby, I., Lovering, A.L., Basford, S.M., Saxon, E.B., Liddell, S.,  
834 Williams, L.E., and Sockett, R.E. (2014). Ras GTPase-Like Protein MglA, a Controller of  
835 Bacterial Social-Motility in Myxobacteria, Has Evolved to Control Bacterial Predation by  
836 *Bdellovibrio*. *PLoS Genet* 10, e1004253. <https://doi.org/10.1371/journal.pgen.1004253>.

- 837 Negus, D., Moore, C., Baker, M., Raghunathan, D., Tyson, J., and Sockett, R.E. (2017). Predator  
838 Versus Pathogen: How Does Predatory *Bdellovibrio bacteriovorus* Interface with the Challenges  
839 of Killing Gram-Negative Pathogens in a Host Setting? *Annu. Rev. Microbiol.* *71*, 441–457.  
840 <https://doi.org/10.1146/annurev-micro-090816-093618>.
- 841 Nicastro, D. (2006). The Molecular Architecture of Axonemes Revealed by Cryoelectron  
842 Tomography. *Science* *313*, 944–948. <https://doi.org/10.1126/science.1128618>.
- 843 Núñez, M.E., Martin, M.O., Duong, L.K., Ly, E., and Spain, E.M. (2003). Investigations into the  
844 Life Cycle of the Bacterial Predator *Bdellovibrio bacteriovorus* 109J at an Interface by Atomic  
845 Force Microscopy. *Biophysical Journal* *84*, 3379–3388. [https://doi.org/10.1016/S0006-](https://doi.org/10.1016/S0006-3495(03)70061-7)  
846 [3495\(03\)70061-7](https://doi.org/10.1016/S0006-3495(03)70061-7).
- 847 Oikonomou, C.M., and Jensen, G.J. (2017). A new view into prokaryotic cell biology from  
848 electron cryotomography. *Nature Reviews Microbiology* *15*, 128.  
849 <https://doi.org/10.1038/nrmicro.2016.195>.
- 850 Ortega, D.R., Yang, W., Subramanian, P., Mann, P., Kjær, A., Chen, S., Watts, K.J., Pirbadian,  
851 S., Collins, D.A., Kooger, R., et al. (2020). Repurposing a chemosensory macromolecular  
852 machine. *Nat Commun* *11*, 2041. <https://doi.org/10.1038/s41467-020-15736-5>.
- 853 Pantanella, F., Iebba, V., Mura, F., Dini, L., Totino, V., Neroni, B., Bonfiglio, G., Maria, T.,  
854 Passariello, C., and Schippa, S. (2018). Behaviour of *Bdellovibrio bacteriovorus* in the presence  
855 of Gram-positive *Staphylococcus aureus*. *New Microbiol* *41*, 145–152. .
- 856 Pasternak, Z., Njagi, M., Shani, Y., Chanyi, R., Rotem, O., Lurie-Weinberger, M.N., Koval, S.,  
857 Pietrokovski, S., Gophna, U., and Jurkevitch, E. (2014). In and out: an analysis of epibiotic vs  
858 periplasmic bacterial predators. *ISME J* *8*, 625–635. <https://doi.org/10.1038/ismej.2013.164>.
- 859 Pérez, J., Moraleda-Muñoz, A., Marcos-Torres, F.J., and Muñoz-Dorado, J. (2016). Bacterial  
860 predation: 75 years and counting!: Bacterial predation. *Environ Microbiol* *18*, 766–779.  
861 <https://doi.org/10.1111/1462-2920.13171>.
- 862 Pettersen, E.F., Goddard, T.D., Huang, C.C., Meng, E.C., Couch, G.S., Croll, T.I., Morris, J.H.,  
863 and Ferrin, T.E. (2021a). UCSF CHIMERA-X : Structure visualization for researchers, educators,  
864 and developers. *Protein Science* *30*, 70–82. <https://doi.org/10.1002/pro.3943>.
- 865 Pettersen, E.F., Goddard, T.D., Huang, C.C., Meng, E.C., Couch, G.S., Croll, T.I., Morris, J.H.,  
866 and Ferrin, T.E. (2021b). UCSF CHIMERA-X : Structure visualization for researchers, educators,  
867 and developers. *Protein Science* *30*, 70–82. <https://doi.org/10.1002/pro.3943>.
- 868 Raghunathan, D., Radford, P.M., Gell, C., Negus, D., Moore, C., Till, R., Tighe, P.J., Wheatley,  
869 S.P., Martinez-Pomares, L., Sockett, R.E., et al. (2019). Engulfment, persistence and fate of  
870 *Bdellovibrio bacteriovorus* predators inside human phagocytic cells informs their future  
871 therapeutic potential. *Sci Rep* *9*, 4293. <https://doi.org/10.1038/s41598-019-40223-3>.
- 872 Rendulic, S. (2004). A Predator Unmasked: Life Cycle of *Bdellovibrio bacteriovorus* from a  
873 Genomic Perspective. *Science* *303*, 689–692. <https://doi.org/10.1126/science.1093027>.

- 874 Rocha, B., Paul, S., and Vashisth, H. (2020). Role of Entropy in Colloidal Self-Assembly.  
875 *Entropy* 22, 877. <https://doi.org/10.3390/e22080877>.
- 876 Rotem, O., Pasternak, Z., and Jurkevitch, E. (2014). *Bdellovibrio* and Like Organisms. In *The*  
877 *Prokaryotes*, E. Rosenberg, E.F. DeLong, S. Lory, E. Stackebrandt, and F. Thompson, eds.  
878 (Berlin, Heidelberg: Springer Berlin Heidelberg), pp. 3–17.
- 879 Rotem, O., Pasternak, Z., Shimoni, E., Belausov, E., Porat, Z., Pietrokovski, S., and Jurkevitch,  
880 E. (2015). Cell-cycle progress in obligate predatory bacteria is dependent upon sequential  
881 sensing of prey recognition and prey quality cues. *Proc Natl Acad Sci USA* 112, E6028–E6037.  
882 <https://doi.org/10.1073/pnas.1515749112>.
- 883 Russo, R., Kolesnikova, I., Kim, T., Gupta, S., Pericleous, A., Kadouri, D., and Connell, N.  
884 (2018). Susceptibility of Virulent *Yersinia pestis* Bacteria to Predator Bacteria in the Lungs of  
885 Mice. *Microorganisms* 7, 2. <https://doi.org/10.3390/microorganisms7010002>.
- 886 Said, N., Chatzinotas, A., and Schmidt, M. (2019). Have an Ion on It: The Life-Cycle of  
887 *Bdellovibrio bacteriovorus* Viewed by Helium-Ion Microscopy. *Adv. Biosys.* 3, 1800250.  
888 <https://doi.org/10.1002/adbi.201800250>.
- 889 Schwudke, D., Bernhardt, A., Beck, S., Madela, K., Linscheid, M.W., Appel, B., and Strauch, E.  
890 (2005). Transcriptional Activity of the Host-Interaction Locus and a Putative Pilin Gene of  
891 *Bdellovibrio bacteriovorus* in the Predatory Life Cycle. *Curr Microbiol* 51, 310–316.  
892 <https://doi.org/10.1007/s00284-005-0030-1>.
- 893 Shatzkes, K., Tang, C., Singleton, E., Shukla, S., Zuena, M., Gupta, S., Dharani, S., Rinaggio, J.,  
894 Connell, N.D., and Kadouri, D.E. (2017a). Effect of predatory bacteria on the gut bacterial  
895 microbiota in rats. *Sci Rep* 7, 43483. <https://doi.org/10.1038/srep43483>.
- 896 Shatzkes, K., Singleton, E., Tang, C., Zuena, M., Shukla, S., Gupta, S., Dharani, S., Rinaggio, J.,  
897 Kadouri, D.E., and Connell, N.D. (2017b). Examining the efficacy of intravenous administration  
898 of predatory bacteria in rats. *Sci Rep* 7, 1864. <https://doi.org/10.1038/s41598-017-02041-3>.
- 899 Shilo, M. (1969). Morphological and Physiological Aspects of the Interaction of *Bdellovibrio*  
900 with Host Bacteria. In *Current Topics in Microbiology and Immunology*, W. Arber, W. Braun, F.  
901 Cramer, R. Haas, W. Henle, P.H. Hofschneider, N.K. Jerne, P. Koldovský, H. Koprowski, O.  
902 Maaløe, et al., eds. (Berlin, Heidelberg: Springer Berlin Heidelberg), pp. 174–204.
- 903 Snellen, J.E., and Starr, M.P. (1974). Ultrastructural aspects of localized membrane damage in  
904 *Spirillum serpens* VHL early in its association with *Bdellovibrio bacteriovorus* 109D. *Arch*  
905 *Microbiol* 100, 179–195. <https://doi.org/10.1007/BF00446316>.
- 906 Sockett, R.E. (2009). Predatory Lifestyle of *Bdellovibrio bacteriovorus*. *Annu. Rev. Microbiol.*  
907 63, 523–539. <https://doi.org/10.1146/annurev.micro.091208.073346>.
- 908 Starr, M.P., and Baigent, N.L. (1966). Parasitic interaction of *Bdellovibrio bacteriovorus* with  
909 other bacteria. *J Bacteriol* 91, 2006–2017. <https://doi.org/10.1128/JB.91.5.2006-2017.1966>.

- 910 Stolp, H., and Starr, M.P. (1963). *Bdellovibrio bacteriovorus* gen. et sp. n., a predatory,  
911 ectoparasitic, and bacteriolytic microorganism. *Antonie van Leeuwenhoek* 29, 217–248.  
912 <https://doi.org/10.1007/BF02046064>.
- 913 Stolp, H., and Starr, M.P. (1965). Bacteriolysis. *Annu. Rev. Microbiol.* 19, 79–104.  
914 <https://doi.org/10.1146/annurev.mi.19.100165.000455>.
- 915 Tan, J., Zhang, X., Wang, X., Xu, C., Chang, S., Wu, H., Wang, T., Liang, H., Gao, H., Zhou,  
916 Y., et al. (2021). Structural basis of assembly and torque transmission of the bacterial flagellar  
917 motor. *Cell* S009286742100430X. <https://doi.org/10.1016/j.cell.2021.03.057>.
- 918 Tang, G., Peng, L., Baldwin, P.R., Mann, D.S., Jiang, W., Rees, I., and Ludtke, S.J. (2007).  
919 EMAN2: An extensible image processing suite for electron microscopy. *Journal of Structural*  
920 *Biology* 157, 38–46. <https://doi.org/10.1016/j.jsb.2006.05.009>.
- 921 Thomashow, L.S., and Rittenberg, S.C. (1985a). Waveform analysis and structure of flagella and  
922 basal complexes from *Bdellovibrio bacteriovorus* 109J. *J Bacteriol* 163, 1038–1046.  
923 <https://doi.org/10.1128/jb.163.3.1038-1046.1985>.
- 924 Thomashow, L.S., and Rittenberg, S.C. (1985b). Isolation and composition of sheathed flagella  
925 from *Bdellovibrio bacteriovorus* 109J. *J Bacteriol* 163, 1047–1054.  
926 <https://doi.org/10.1128/jb.163.3.1047-1054.1985>.
- 927 Thomashow, M.F., and Rittenberg, S.C. (1978a). Intraperiplasmic growth of *Bdellovibrio*  
928 *bacteriovorus* 109J: solubilization of *Escherichia coli* peptidoglycan. *J Bacteriol* 135, 998–1007.  
929 <https://doi.org/10.1128/JB.135.3.998-1007.1978>.
- 930 Thomashow, M.F., and Rittenberg, S.C. (1978b). Intraperiplasmic growth of *Bdellovibrio*  
931 *bacteriovorus* 109J: N-deacetylation of *Escherichia coli* peptidoglycan amino sugars. *J Bacteriol*  
932 135, 1008–1014. <https://doi.org/10.1128/jb.135.3.1008-1014.1978>.
- 933 Thomashow, M.F., and Rittenberg, S.C. (1978c). Intraperiplasmic growth of *Bdellovibrio*  
934 *bacteriovorus* 109J: attachment of long-chain fatty acids to *Escherichia coli* peptidoglycan. *J*  
935 *Bacteriol* 135, 1015–1023. <https://doi.org/10.1128/jb.135.3.1015-1023.1978>.
- 936 Thomashow, L. S., R., S.C. (1979). Descriptive biology of the bdellovibrios. In  
937 *Developmental Biology of Prokaryotes*. Parish, J.H. (ed.). Berkeley, CA: University of  
938 California Press. 115–138. .
- 939 Tian, M., Wu, Z., Zhang, R., and Yuan, J. (2022). A new mode of swimming in singly  
940 flagellated *Pseudomonas aeruginosa*. *Proc. Natl. Acad. Sci. U.S.A.* 119, e2120508119.  
941 <https://doi.org/10.1073/pnas.2120508119>.
- 942 Toyofuku, M., Nomura, N., and Eberl, L. (2019). Types and origins of bacterial membrane  
943 vesicles. *Nature Reviews Microbiology* 17, 13–24. <https://doi.org/10.1038/s41579-018-0112-2>.
- 944 Treuner-Lange, A., Chang, Y.-W., Glatter, T., Herfurth, M., Lindow, S., Chreifi, G., Jensen,  
945 G.J., and Sogaard-Andersen, L. (2020). PilY1 and minor pilins form a complex priming the type

- 946 IVa pilus in *Myxococcus xanthus*. *Nat Commun* *11*, 5054. [https://doi.org/10.1038/s41467-020-](https://doi.org/10.1038/s41467-020-18803-z)  
947 18803-z.
- 948 Tudor, J.J., and Karp, M.A. (1994). Translocation of an outer membrane protein into prey  
949 cytoplasmic membranes by bdellovibrios. *J Bacteriol* *176*, 948–952.  
950 <https://doi.org/10.1128/jb.176.4.948-952.1994>.
- 951 Tudor, J.J., McCann, M.P., and Acrich, I.A. (1990). A new model for the penetration of prey  
952 cells by bdellovibrios. *Journal of Bacteriology* *172*, 2421–2426.  
953 <https://doi.org/10.1128/JB.172.5.2421-2426.1990>.
- 954 Willis, A.R., Moore, C., Mazon-Moya, M., Krokowski, S., Lambert, C., Till, R., Mostowy, S.,  
955 and Sockett, R.E. (2016). Injections of Predatory Bacteria Work Alongside Host Immune Cells  
956 to Treat *Shigella* Infection in Zebrafish Larvae. *Current Biology* *26*, 3343–3351.  
957 <https://doi.org/10.1016/j.cub.2016.09.067>.
- 958 Yamaguchi, T., Makino, F., Miyata, T., Minamino, T., Kato, T., and Namba, K. (2020).  
959 Structure of the molecular bushing of the bacterial flagellar motor (*Molecular Biology*).
- 960 Zheng, S.Q., Keszthelyi, B., Branlund, E., Lyle, J.M., Braunfeld, M.B., Sedat, J.W., and Agard,  
961 D.A. (2007). UCSF tomography: an integrated software suite for real-time electron microscopic  
962 tomographic data collection, alignment, and reconstruction. *J. Struct. Biol.* *157*, 138–147.  
963 <https://doi.org/10.1016/j.jsb.2006.06.005>.
- 964 Zhu, S., and Gao, B. (2020). Bacterial Flagella Loss under Starvation. *Trends in Microbiology*  
965 <https://doi.org/10.1016/j.tim.2020.05.002>.
- 966 Zhu, S., Schniederberend, M., Zhitnitsky, D., Jain, R., Galán, J.E., Kazmierczak, B.I., and Liu, J.  
967 (2019). *In Situ* Structures of Polar and Lateral Flagella Revealed by Cryo-Electron Tomography.  
968 *Journal of Bacteriology* *201*. <https://doi.org/10.1128/JB.00117-19>.
- 969 Zhuang, X.-Y., and Lo, C.-J. (2020). Construction and Loss of Bacterial Flagellar Filaments.  
970 *Biomolecules* *10*, 1528. <https://doi.org/10.3390/biom10111528>.
- 971 Zhuang, X., Guo, S., Li, Z., Zhao, Z., Kojima, S., Homma, M., Wang, P., Lo, C., and Bai, F.  
972 (2020). Live-cell fluorescence imaging reveals dynamic production and loss of bacterial flagella.  
973 *Molecular Microbiology* *114*, 279–291. <https://doi.org/10.1111/mmi.14511>.
- 974 Zivanov, J., Nakane, T., Forsberg, B.O., Kimanius, D., Hagen, W.J., Lindahl, E., and Scheres,  
975 S.H. (2018). New tools for automated high-resolution cryo-EM structure determination in  
976 RELION-3. *ELife* *7*, e42166. <https://doi.org/10.7554/eLife.42166>.
- 977

978 **Figure legends**

979 **Figure 1: Anatomy of attack-phase *B. bacteriovorus*.** **A)** A slice through an electron cryo-  
980 tomogram of an attack phase *B. bacteriovorus* cell, with enlarged views of the flagellated (red)  
981 and biting (blue) poles. White rectangles highlight the flagellar motor (upper panel) and non-  
982 piliated T4aP basal body (lower panel), and the white ellipse highlights a rose-like complex.  
983 Question mark points to a cross-section through a periplasmic tubular structure, and white arrow  
984 to a type IVa pilus. Scale bars are 50 nm. **B-D)** Central slices through subtomogram averages of  
985 the *B. bacteriovorus* flagellar motor (B), rose-like complex (C), and non-piliated T4aP basal body  
986 (D). White arrows in D point to the extracellular ring of the T4aP basal body. Scale bars are 20  
987 nm. Dashed black lines indicate a composite of slices through the tomogram at different z-heights  
988 in (A), and a composite of subtomogram averages aligned on the outer and inner membrane,  
989 respectively, in (C). OM = outer membrane, IM = inner membrane.

990

991 **Figure 2: Attachment of *B. bacteriovorus* to prey.** **A)** A slice through an electron cryo-tomogram  
992 showing a *B. bacteriovorus* cell attached to a prey (*E. coli* minicell) vi a T4aP. OM = outer  
993 membrane, IM = inner membrane. **B)** A Slice through an electron cryo-tomogram of *B.*  
994 *bacteriovorus* attached to prey (*E. coli* minicell) showing non-piliated T4aP basal bodies (white  
995 ellipses) penetrating to the prey's PG layer. **C)** A slice through an electron cryo-tomogram of *B.*  
996 *bacteriovorus* attached to prey with a polar attachment plaque. PG = peptidoglycan. Scale bars 100  
997 nm.

998

999 **Figure 3: *B. bacteriovorus* flagellar absorption.** **A)** A slice through an electron cryo-tomogram  
1000 showing a *B. bacteriovorus* cell attached to a prey via an attachment plaque with its flagellum



1001 resorbing into the periplasm. Enlargements in the red-boxed areas highlight different parts of the  
1002 absorbed flagellum. Scale bar is 50 nm in the main panel, 20 nm in the enlargements. **B)** A 3D  
1003 segmentation of panel (A) and an enlarged view illustrating different parts of the absorbed  
1004 flagellum.

1005

1006 **Figure 4: *B. bacteriovorus* prey invasion.** **A)** A slice through an electron cryo-tomogram (left)  
1007 and enlarged view (right) showing a stalled invasion by a *B. bacteriovorus* of an *E. coli* minicell.  
1008 Blue arrows and inset schematic highlight the portal. **B)** Right (top): Cross-section through the *yz*  
1009 plane of the tomogram shown in (A) along the black dotted line indicated on the left. Note that this  
1010 slice does not include the portal. Right (bottom): Average density profile taken along the white  
1011 dashed line (inside the white rectangle) in the top panel. The distance between the predator's inner  
1012 (IM) and outer membranes (OM) is indicated (20 nm). **C)** Similar to (B) but for a *yz* slice where  
1013 the portal is visible. The distance between the predator's inner and outer membranes is indicated  
1014 (10 nm). The schematics in the right panels of (A-C) represent the white-boxed areas in the  
1015 corresponding slices, with the portal shown in blue, the prey outer membrane in grey, and the  
1016 predator inner and outer membranes in black. Scale bars 100 nm in the left panel of (A), and 50  
1017 nm in other panels.

1018

1019 **Figure 5: Anatomy of the bdelloplast.** **A-C)** Slices (at different *z*-levels) through an electron  
1020 cryo-tomogram of a *V. cholerae* bdelloplast containing two *B. bacteriovorus* after predator  
1021 division. **D)** A 3D segmentation of the bdelloplast shown in (A-C). **E)** Enlargement (left) and 3D  
1022 segmentation (right) of the white-boxed area in (A), highlighting the features of the seal. **F)**  
1023 Enlargement (left) and 3D segmentation (right) of the white-boxed area in (C), rotated 180°,

1024 highlighting the prey flagellar relic. OM= outer membrane. Scale bars 100 nm in (A-C) and 50 nm  
1025 in (E, F).

1026

1027 **Figure 6: Ribosomal nucleoid lattice in the end-stage bdelloplast. A, B)** Slices (at different z-  
1028 levels) through an electron cryo-tomogram of an end-stage *E. coli* bdelloplast containing two *B.*  
1029 *bacteriovorus* cells after predator division, highlighting the hexagonal arrangement of ribosomes  
1030 around the nucleoids. **C, D)** Rotated views of a 3D segmentation of the nucleoids and ribosomes  
1031 of the cryo-tomogram shown in (A, B). Scale bars 50 nm. **E)** Distances of individual ribosomes  
1032 from the nucleoid surface measured in the 3D segmentations of the cryo-tomogram shown in  
1033 (A&B) (“experiment,” solid line), compared to a simulation of randomly distributed 20 nm-wide  
1034 spheres packed in the same segmented volume (“random,” dashed line). See also Movie S16.

1035

1036

1037

1038

1039

1040

1041

1042

1043

1044

1045

1046 **Acknowledgements**

1047 This project was funded by the National Institutes of Health (grant R01 AI127401 to G.J.J) and a  
1048 Baxter postdoctoral fellowship from Caltech to M.K. S.K. is supported by the Swedish Research  
1049 Council (2019-06293). Cryo-ET work was performed in the Beckman Institute Resource Center  
1050 for Transmission Electron Microscopy at the California Institute of Technology and the Howard  
1051 Hughes Medical Institute Janelia Farm CryoEM Facility. We thank Daniel Villanueva Avalos for  
1052 making the summary animation. We are deeply grateful to Prof. Liz Sockett (University of  
1053 Nottingham) for the gift of the *B. bacteriovorus* strain and helpful advice and comments.

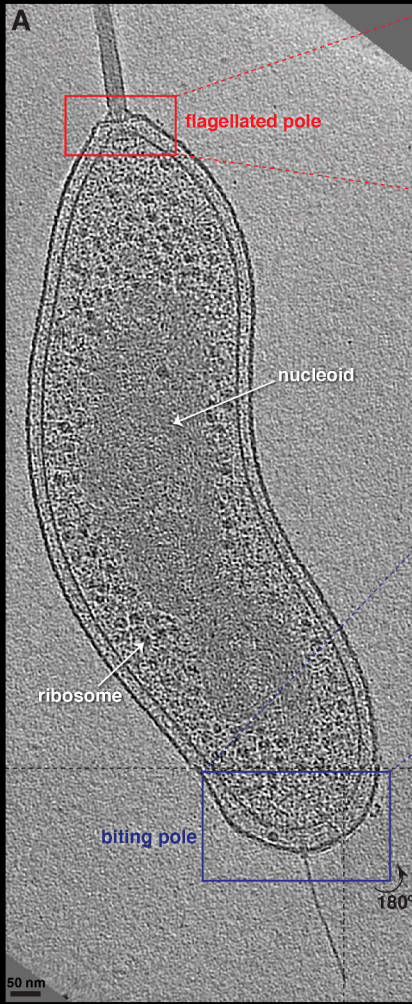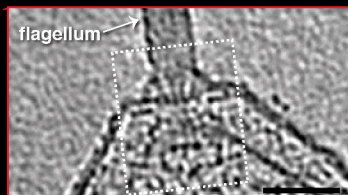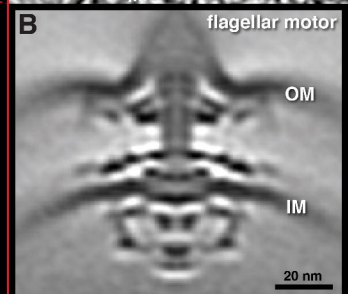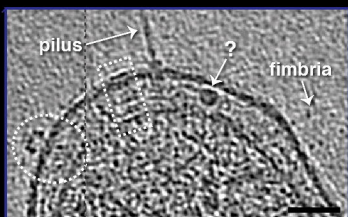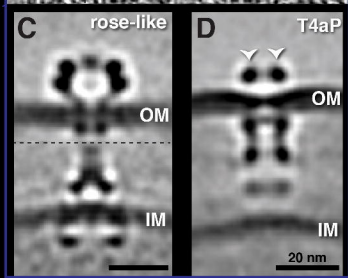

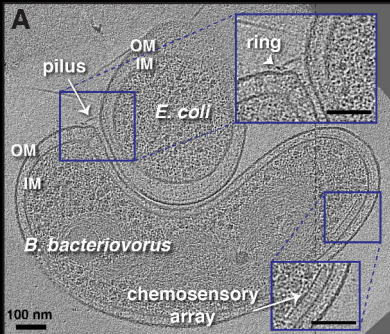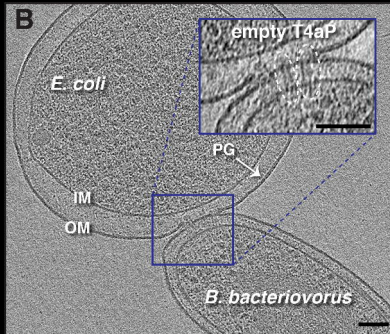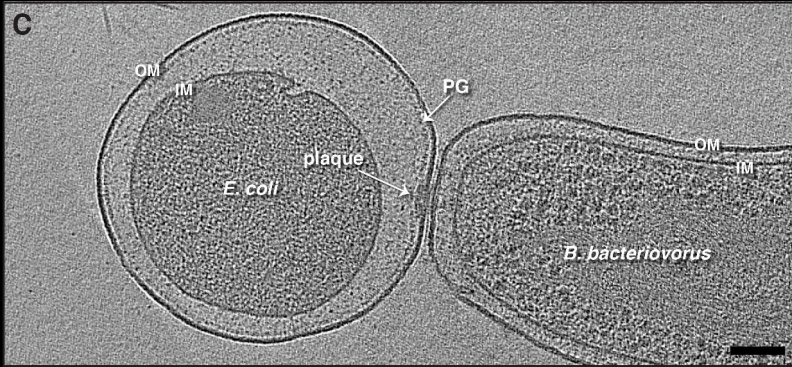

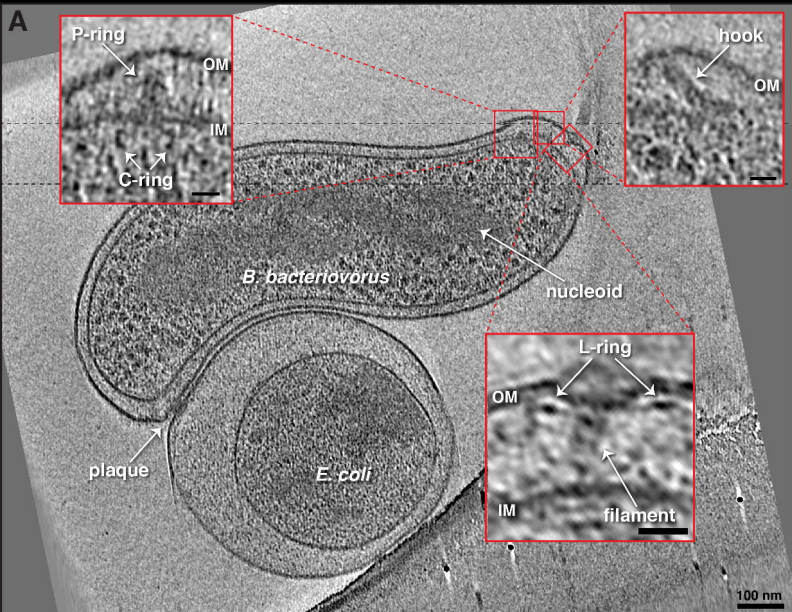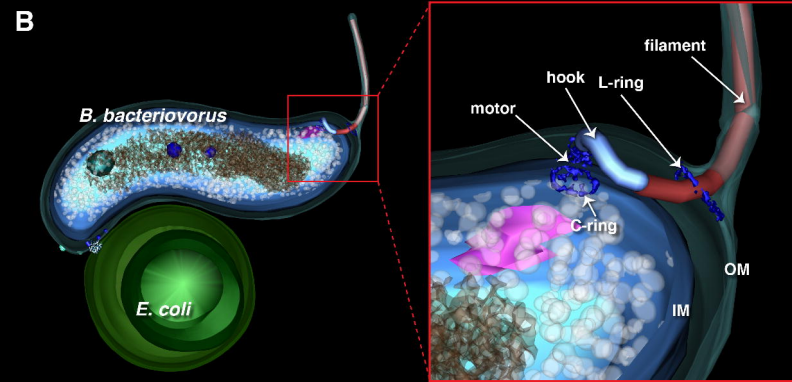

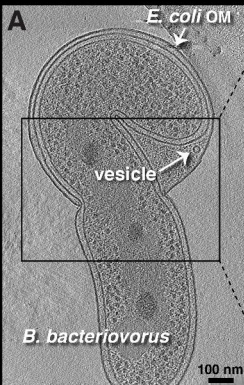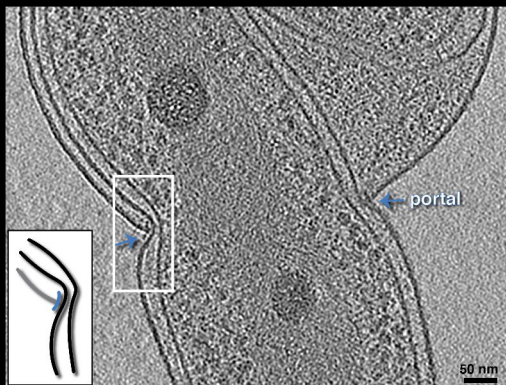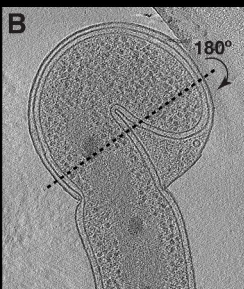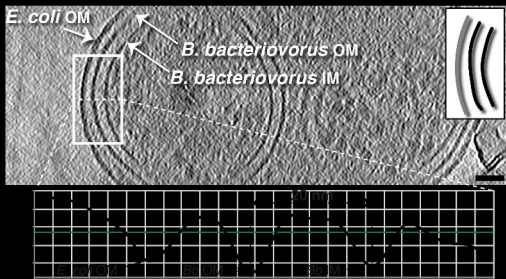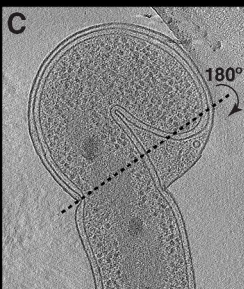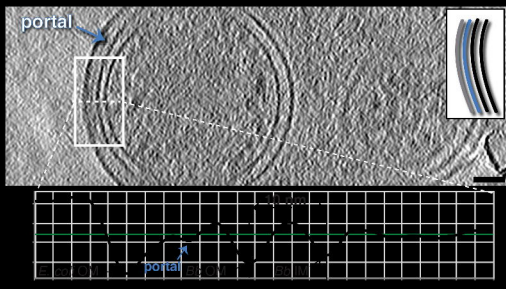

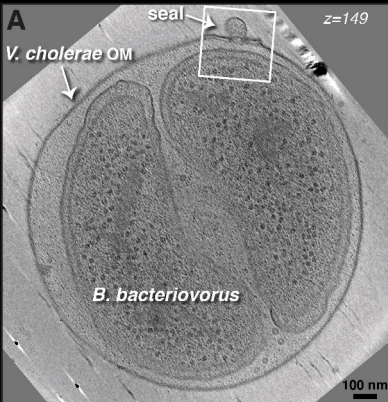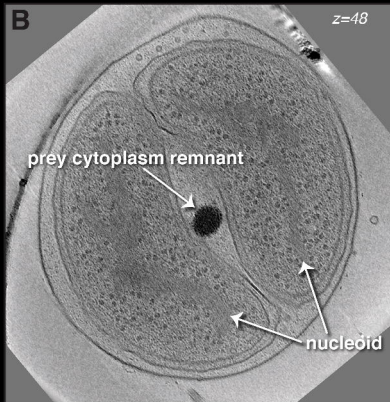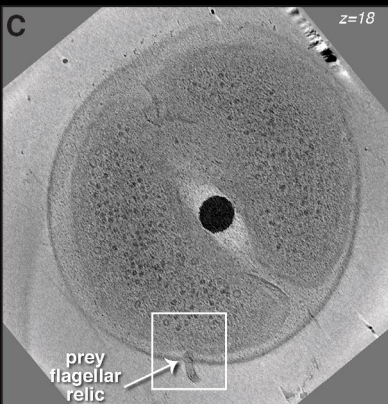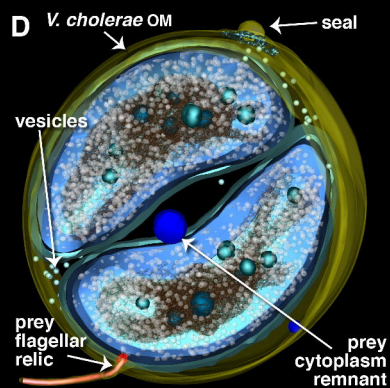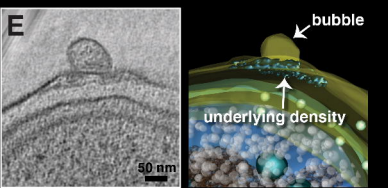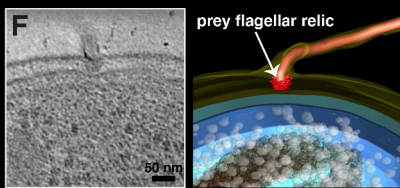



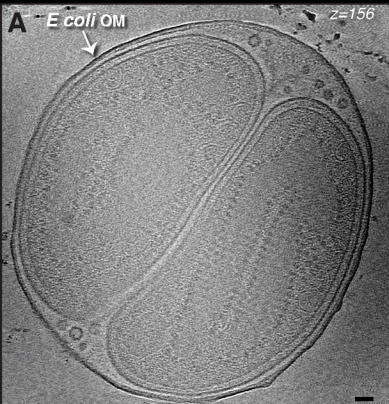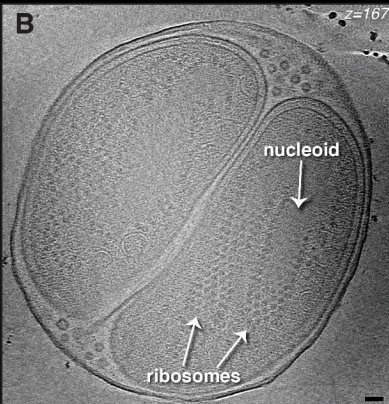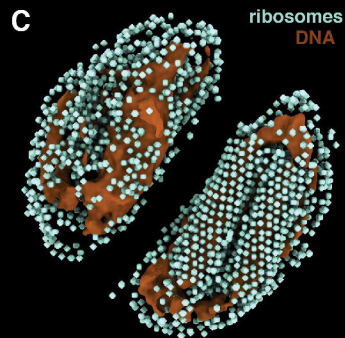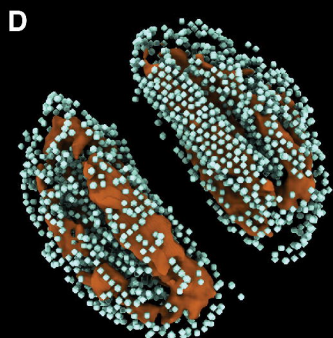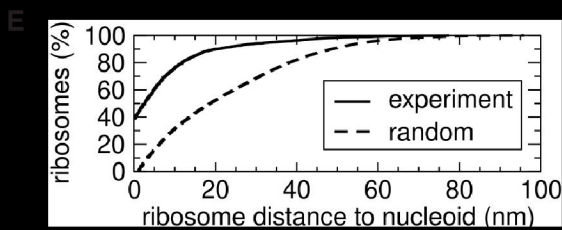

Source: https://www.biorxiv.org/content/10.1101/2022.06.13.496000v1.full.pdf
